## **Multistate Ornstein-Uhlenbeck approach for practical estimation of movement and resource selection around central places**

Joseph M. Eisaguirre<sup>a,b,1</sup>, Travis L. Booms<sup>c</sup>, Christopher P. Barger<sup>c</sup>, Scott D. Goddard<sup>b</sup> and Greg A. Breed<sup>a,d</sup>

<sup>a</sup>Dept. of Biology & Wildlife, Univ. of Alaska Fairbanks, Fairbanks, AK, USA

<sup>b</sup>Dept. of Mathematics & Statistics, Univ. of Alaska Fairbanks, Fairbanks, AK, USA

<sup>c</sup>Alaska Department of Fish & Game, Fairbanks, AK, USA

<sup>d</sup>Institute of Arctic Biology, University of Alaska Fairbanks, Fairbanks, AK, USA

<sup>1</sup>contact: [jmeisaguirre@alaska.edu](mailto:jmeisaguirre@alaska.edu)

October 28, 2020

# 1 Abstract

- 2 1. Home range dynamics and movement are central to a species' ecology and strongly  
3 mediate both intra- and interspecific interactions. Numerous methods have been  
4 introduced to describe animal home ranges, but most lack predictive ability and  
5 cannot capture effects of dynamic environmental patterns, such as the impacts of  
6 air and water flow on movement.
- 7 2. Here, we develop a practical, multi-stage approach for statistical inference into the  
8 behavioral mechanisms underlying how habitat and dynamic energy landscapes—in  
9 this case how airflow increases or decreases the energetic efficiency of flight—shape  
10 animal home ranges based around central places. We validated the new approach  
11 using simulations, then applied it to a sample of 12 adult golden eagles *Aquila*  
12 *chrysaetos* tracked with satellite telemetry.
- 13 3. The application to golden eagles revealed effects of habitat variables that align with  
14 predicted behavioral ecology. Further, we found that males and females partition  
15 their home ranges dynamically based on uplift. Specifically, changes in wind and  
16 sun angle drove differential space use between sexes, especially later in the breeding  
17 season when energetic demands of growing nestlings require both parents to forage  
18 more widely.
- 19 4. This method is easily implemented using widely available programming languages  
20 and is based on a hierarchical multistate Ornstein-Uhlenbeck space use process  
21 that incorporates habitat and energy landscapes. The underlying mathematical  
22 properties of the model allow straightforward computation of predicted utilization  
23 distributions, permitting estimation of home range size and visualization of space  
24 use patterns under varying conditions.

## 25 **Keywords**

26 Bayesian, continuous time model, golden eagle, Lunn method, Markov process, movement  
27 model, biased random walk, recursive Bayes, empirical Bayes

## 28 **Introduction**

29 The “home range” has been a central concept in animal behavior for some time (Burt,  
30 1943; Dunn and Gipson, 1977). To measure and understand an animal’s home range—the  
31 area in which an animal carries out its regular foraging and reproductive activities (Burt,  
32 1943)—researchers have applied techniques ranging from simple and purely descriptive,  
33 such as methods like minimum convex polygons and kernel density estimators, to complex  
34 mechanistic models, such as advection-diffusion equations (Moorcroft and Lewis, 2006;  
35 Hooten et al., 2017). Along this spectrum of complexity are a set of analyses of interme-  
36 diate complexity known as resource selection functions (RSFs; Manly et al., 2002) and  
37 related step selection functions (SSFs; Fortin et al., 2005). The RSF and SSF frameworks  
38 separate the probability of an animal occurring at a location on the landscape into two  
39 parts: availability (or movement) and resource selection (Moorcroft and Barnett, 2008).  
40 Together, movement and resource weighting functions can describe an array of animal  
41 space use patterns (Potts et al., 2014b).

42 One early conceptual model of animal space use dynamics was the “elastic disc hypoth-  
43 esis,” which describes animal space use as the degree to which boundaries of territories  
44 are compressible, shaped by the territorial aggression of neighboring conspecifics (Huxley,  
45 1934). This process is analogous to the way an elastic disc can be molded by extrinsic  
46 forces, and the analogy forms a general conceptual foundation describing the formation  
47 and dynamics of animal home ranges (Getty, 1981). For example, consider an animal  
48 that requires a certain amount of suitable habitat. Given no extrinsic forces, that an-  
49 imal might spend much of its time within a smaller core area, venturing out equally  
50 in all directions to acquire resources. This would give rise to a circular or disc-shaped  
51 home range, and would be especially true for an animal that has a “central place” such

52 as a nest or den that requires tending. In contrast, where an animal resides near the  
53 boundary of suitable habitat, its home range must stretch along that boundary, as the  
54 amount of suitable habitat required remains constant, and the shape of the home range  
55 will consequently conform to habitat constraints.

56 In reality, habitat constraints can change through time. However, many of the more  
57 common approaches to quantifying animal home ranges describe animal space use as static  
58 in time, either because the descriptive method cannot accommodate time or home ranges  
59 are actually assumed to be static. Animal movement, however, is usually much more fluid,  
60 driven by suites of intrinsic and extrinsic forces (Nathan et al., 2008). Consequently, home  
61 ranges are fundamentally dynamic.

62 Forces that drive these dynamics include the energy landscape, a conceptual frame-  
63 work that incorporates how an animal's movement can be shaped by its energetic demands  
64 interacting with dynamic landscape features, especially moving fluids such as air or water  
65 (Shepard et al., 2013). These dynamics alter a landscape's suitability and shape space  
66 use patterns in a number of ways (Morales and Ellner, 2002; Schooley and Wiens, 2004;  
67 Prokopenko et al., 2016). For animals that can take advantage of variable energy sub-  
68 sidies available from moving fluids, including soaring birds that use uplift and aquatic  
69 animals that ride water currents, dynamic space use patterns and emergent home range  
70 properties will be shaped by these features (Shepard et al., 2013). In such situations, the  
71 elastic disc will constantly vary, changing shape as the weather changes.

72 The RSFs and SSFs noted earlier are widely used and generally robust quantitative  
73 assessments of animal space use and home range dynamics, and they have been continu-  
74 ously refined and improved since their respective introductions. Getty (1981) presented  
75 an early RSF adaptation inspired by the elastic disc hypothesis. Another early model  
76 has also been considered in understanding animal home ranges—the Ornstein-Uhlenbeck  
77 (OU) process (Dunn and Gipson, 1977)—and can relate to the elastic disc hypothesis.

78 Here, we develop a practical hierarchical modelling approach for inferring the mecha-  
79 nisms of home range dynamics and how habitat and the energy landscape interact with  
80 behavior to shape animal home ranges. This method combines the OU and SSF mod-

81 elling frameworks and operates on landscapes with dynamic energy subsidies driven by  
82 atmospheric forcing. The approach is similar to but extends some previously introduced  
83 methods (i.e. Johnson et al., 2008; Christ et al., 2008), which have not seemed to gain  
84 traction among practitioners, likely due to computational limitations and difficulty in  
85 application. Our approach overcomes computational issues and eases application with-  
86 out sacrificing inference, which we validated with a simulation study. Finally, we applied  
87 it to analyze the home range behavior and space use of territorial golden eagles *Aquila*  
88 *chrysaetos*. Specifically, we fit models to estimate how male and female territorial ea-  
89 gles partitioned space during the breeding season based on different habitats or dynamic  
90 features of the landscape (i.e. thermal and orographic uplift).

## 91 **Methods**

### 92 **Ornstein-Uhlenbeck home range model**

93 An OU process over two-dimensional space is continuous-time, mean-reverting, and can  
94 help researchers study home range behavior of animals that tend a central place (e.g., a  
95 nest; Dunn and Gipson, 1977; Blackwell, 1997; Breed et al., 2017). Assuming indepen-  
96 dence in the two spatial dimensions simplifies the model and aligns better with central  
97 place behavior, as movement is equally likely in all directions around the central point.  
98 Such an OU process can be presented as the following stochastic differential equation  
99 (SDE):

$$d\mathbf{x}_t = -\mathbf{\Omega}dt(\mathbf{x}_t - \boldsymbol{\mu}) + \sigma d\mathbf{W}_t, \quad (1)$$

100 where  $\mathbf{x}_t$  is a coordinate vector of the location of the animal at time  $t$ ,  $\mathbf{\Omega} = \omega\mathbf{I}_2$  with  
101  $\omega$  describing the strength of the animal's tendency to move toward the central point  $\boldsymbol{\mu}$ ,  
102  $\sigma > 0$ , and  $\mathbf{W}_t$  is Brownian motion. The solution of this SDE takes the form:

$$\mathbf{x}_t = \boldsymbol{\mu} + e^{-\mathbf{\Omega}t}(\mathbf{x}_0 - \boldsymbol{\mu}) + \sigma \int_0^t e^{-\mathbf{\Omega}(t-s)} d\mathbf{W}_s. \quad (2)$$

103 While this solution conveniently gives the position of the animal at any time  $t$ , we typically  
104 observe animal movement by recording series of discrete locations by, for example, using  
105 radio or GPS telemetry. This invokes the position likelihood of the OU process:

$$\mathbf{x}_t | \mathbf{x}_{t-\Delta t} \sim \mathcal{N} \left( \boldsymbol{\mu} + e^{-\Omega \Delta t} (\mathbf{x}_{t-\Delta t} - \boldsymbol{\mu}), \boldsymbol{\Sigma} - e^{-\Omega \Delta t} \boldsymbol{\Sigma} e^{-\Omega' \Delta t} \right), \quad (3)$$

106 where  $\boldsymbol{\Sigma} = \sigma^2 \mathbf{I}_2$ . This discretized formulation can be described as a biased random walk  
107 (BRW) with a bias toward  $\boldsymbol{\mu}$ . Notably, it reaches a long term steady state  $\mathcal{N}(\boldsymbol{\mu}, \boldsymbol{\Sigma})$  due  
108 to the rapidly decaying effect of conditioning on  $\mathbf{x}_t$  as  $\Delta t$  increases (Blackwell, 1997).

109 Assuming independence in the two spatial dimensions helps wed the OU process to  
110 the elastic disc hypothesis (Huxley, 1934; Getty, 1981), similar to the circular normal  
111 distribution used by Getty (1981). A chosen contour of  $\mathcal{N}(\boldsymbol{\mu}, \boldsymbol{\Sigma})$  can be a circular ap-  
112 proximation of an animal's home range. Further, the highest probability density value of  
113  $\mathcal{N}(\boldsymbol{\mu}, \boldsymbol{\Sigma})$  is centered on  $\boldsymbol{\mu}$ , consistent with central place behavior. Note that using equa-  
114 tion (8) takes into account serial correlation, which is inherent to an animal's movement,  
115 ensuring an unbiased estimate of  $\boldsymbol{\Sigma}$ . Additionally, the continuous-time nature of the pro-  
116 cess makes it applicable under any temporal resolution of data and any irregularities in  
117 that data.

118 The shape of the home range may be modified by various extrinsic factors (Getty,  
119 1981), which can be built into the OU process with an RSF in the weighted distribution  
120 framework (Johnson et al., 2008). The general form of this framework describes the  
121 probability density  $f_u$  of an animal's location over some landscape  $\mathbf{z}$  containing a suite  
122 of habitat types and resources as the product of a density explaining what is available to  
123 the animal  $f_a$  and a weighting function  $\psi$ :

$$f_u(\mathbf{z}) = K^{-1} \psi(\mathbf{z}) f_a(\mathbf{z}), \quad (4)$$

124 where  $K$  is a normalizing constant. When  $f_a$  takes the form of an OU process (equation  
125 8) and  $\psi(\mathbf{z}(\mathbf{x}_t)) = \exp[\mathbf{z}(\mathbf{x}_t)' \boldsymbol{\beta}]$ , where the function  $\mathbf{z}(\mathbf{x}_t)$  returns a vector of habitat  
126 values and/or resources associated with a location  $\mathbf{x}_t$  that lies in  $\mathbf{z}$  and  $\boldsymbol{\beta}$  weights those

127 resources based on the animal’s preferences, the conditional probability density of the  
128 location of the animal can be written as

$$f_u(\mathbf{z}|\mathbf{x}_{t-\Delta t}) = K^{-1} \exp[\mathbf{z}(\mathbf{x}_t)' \boldsymbol{\beta} - (\mathbf{x}_t - \boldsymbol{\mu}_t)' \boldsymbol{\Sigma}_t^{-1} (\mathbf{x}_t - \boldsymbol{\mu}_t)/2], \quad (5)$$

129 where  $\boldsymbol{\mu}_t = \boldsymbol{\mu} + e^{-\Omega \Delta t} (\mathbf{x}_{t-\Delta t} - \boldsymbol{\mu})$  and  $\boldsymbol{\Sigma}_t = \boldsymbol{\Sigma} - e^{-\Omega \Delta t} \boldsymbol{\Sigma} e^{-\Omega' \Delta t}$  (Johnson et al., 2008).  
130 Note that the habitat covariates ( $\mathbf{z}(\mathbf{x}_t)$ ) are spatiotemporally explicit so that the effects  
131 of dynamic habitat and landscape variables may be accounted for in estimation of pa-  
132 rameters and predicting utilization distributions.

133 **Multi-stage estimation** Evaluating  $K$  is usually problematic but often avoided in es-  
134 timating  $\boldsymbol{\beta}$ , as with more conventional RSF models, by implementing an use-availability  
135 design that compares resources at ‘available’ locations to ‘used’ locations with logistic  
136 regression (Lele and Keim, 2006; Hooten et al., 2017). We note that equation (5) re-  
137 sembles a more conventional RSF model with an offset term—the anisotropic distance  
138 between  $\mathbf{x}_t$  and  $\mathbf{x}_{t-\Delta t}$  (Johnson et al., 2008). We consequently posited that if the OU  
139 process parameters were estimated first, then were used to construct the necessary co-  
140 variate (i.e.  $(\mathbf{x}_t - \boldsymbol{\mu}_t)' \boldsymbol{\Sigma}_t^{-1} (\mathbf{x}_t - \boldsymbol{\mu}_t)/2$ ),  $\boldsymbol{\beta}$  could then be estimated in a second step with  
141 regression, which is similar to constructing covariates for estimating  $\boldsymbol{\beta}$  with Poisson re-  
142 gression (Johnson et al., 2013) and conditional logistic regression (Forester et al., 2009).  
143 Although a sacrifice in statistical elegance, this saves considerable model complexity and  
144 estimation challenge, especially when hierarchical inference of  $\boldsymbol{\beta}$  across several individu-  
145 als is a primary goal. As we show, the inference achieved with this procedure does not  
146 meaningfully differ from the more elegant, but far more difficult approach, described by  
147 Johnson et al. (2008), and makes available hierarchical estimation that is not possible  
148 with their method.

149 Our proposed estimation procedure is as follows. First, estimate the movement param-  
150 eters in equation 8. Second, use those fitted parameters to make predictions about each  
151  $\mathbf{x}_t$ , effectively generating so-called available locations. Assuming estimation of equation  
152 8 is done in a Bayesian framework, this second step involves sampling from the marginal

153 posterior predictive distributions (Hooten et al., 2014, 2017; Eisaguirre et al., 2020). Next,  
154 the quantities  $(\mathbf{x}_t - \boldsymbol{\mu}_t)' \boldsymbol{\Sigma}_t^{-1} (\mathbf{x}_t - \boldsymbol{\mu}_t) / 2$  are computed using point estimates of param-  
155 eters. Finally, the selection coefficients  $\boldsymbol{\beta}$  are estimated using logistic regression, as in  
156 conventional use-availability resource selection analysis designs, which, in the Bayesian  
157 framework, is an empirical Bayes procedure.

158 If multilevel inference across several individual animals is desired, it is typically  
159 straightforward to incorporate such complexity in the regression model for estimating  
160  $\boldsymbol{\beta}$ . Higher level inference of the movement parameters may pose a challenge, however, in  
161 which case recursive Bayesian inference could be used (Lunn et al., 2013; Hooten et al.,  
162 2016; Hooten and Hefley, 2019); we detail this in the Model Extensions section below.  
163 Of course, such could be used for estimating  $\boldsymbol{\beta}$  as well, if the regression model structure  
164 poses estimation challenges.

165 **Dynamic utilization distributions** An advantage of the OU model within this frame-  
166 work is that it explicitly weights locations closer to the central point  $\boldsymbol{\mu}$  more heavily. If it  
167 did not, space use in that area would be attributed solely to habitat or resources there, as  
168 opposed to availability, which could bias  $\hat{\boldsymbol{\beta}}$ . Another advantage of this OU model is that  
169 it can be used to compute home range estimates from a set of hypothesized mechanisms,  
170 such as different, possibly interacting, and/or dynamic habitat variables. Given that  $\psi$   
171 is assumed stationary and as  $\Delta t$  gets large  $f_a$  approaches  $\mathcal{N}(\boldsymbol{\mu}, \boldsymbol{\Sigma})$ ,

$$\lim_{\Delta t \rightarrow \infty} f_u(\mathbf{z} | \mathbf{x}_{t-\Delta t}) = K^{-1} \exp[\mathbf{z}(\mathbf{x}_t)' \boldsymbol{\beta}] \exp[-(\mathbf{x}_t - \boldsymbol{\mu})' \boldsymbol{\Sigma}^{-1} (\mathbf{x}_t - \boldsymbol{\mu}) / 2], \quad (6)$$

172 which is simply the normalized product of a multivariate normal kernel and the habitat  
173 weighting function. We are thus left with habitat-independent central place (circular)  
174 home range estimator  $\mathcal{N}(\boldsymbol{\mu}, \boldsymbol{\Sigma})$  and a weighting function  $\psi(\mathbf{z}) = \exp[\mathbf{z}(\mathbf{x}_t)' \boldsymbol{\beta}]$  that shapes  
175 the home range (equation 6). The product of these provides the stationary estimate of  $f_u$ ,  
176 a contour of which is the mathematical description of the conceptual elastic disc (Huxley,  
177 1934) molded by the habitat (Fig. 1). Further, when the resources over the landscape  
178  $\mathbf{z}$  vary through time and are dynamic, evaluating the steady state of  $f_u$  must be done



179 with resource values  $\mathbf{z}(\mathbf{x}_{t^*})$  fixed at some hypothetical or characteristic time  $t = t^*$ . We  
180 can thus choose  $t^*$  to make predictions about how space use changes based on dynamic  
181 resources. This is in contrast to many RSF and SSF studies in the literature, which  
182 are typically restricted to evaluating  $\psi(\mathbf{z}(\mathbf{x}_{t^*}))$ , rather than the utilization distribution  
183  $f_u(\mathbf{z}(\mathbf{x}_{t^*}))$ .

## 184 Simulation study

185 **Methods** To ensure that estimation of the OU process and resource selection parameter  
186 estimates were unbiased and informative when estimated with the multi-stage procedure,  
187 we conducted a simulation study generally following the approaches of Forester et al.  
188 (2009) and Johnson et al. (2008). The simulation began with the creation of three  
189 artificial landscapes containing a continuous resource variable. Using R and the package  
190 `RandomFields` (R Core Team, 2018; Schlather et al., 2019), landscapes were generated on  
191 a  $2000 \times 2000$  grid using a Gaussian random field (GRF) with an exponential covariance  
192 function. The scale parameter was set at 10, 50, or 100, prescribing each landscape a  
193 different level of spatial autocorrelation. We simulated 100 tracks, each 100 movements  
194 in length, for each landscape and each of six parameter combinations ( $\beta = 0, 1$ , or 2  
195 and  $\omega = 1$  or 2) for a total of 18 landscape/parameter scenarios.  $\sigma^2$  was fixed at  $100^2$   
196 and  $\boldsymbol{\mu}$  at (1000, 1000). Additionally, to ensure identifiability of  $\boldsymbol{\beta}$  in the case of multiple  
197 covariates, we did one simulation with the scale parameter set to 100,  $\omega = 2$ ,  $\beta_1 = 1$ ,  
198 and  $\beta_2 = 1$ , where  $\beta_2$  is the coefficient for a binary covariate covering half of the spatial  
199 domain. For each simulated track, we fit the OU model, assuming the central point  $\boldsymbol{\mu}$   
200 known, generated available points, computed the necessary covariate from the estimated  
201 OU parameters, and then attempted to estimate  $\beta$  with an use-availability design using  
202 logistic regression.

203 Estimation was performed in a Bayesian framework using Stan and R (Stan Devel-  
204 opment Team, 2016, 2018; R Core Team, 2018), sampling five available points for each  
205 used point from the marginal posterior predictive distributions of each  $\mathbf{x}_t$  (Hooten et al.,  
206 2014, 2017; Eisaguirre et al., 2020). We used three chains of 15,000 Hamiltonian Monte

207 Carlo (HMC) iterations, including 5,000 for warm-up, and retained 1,000 samples for  
208 inference in fitting the OU movement model. We used four chains of 5,000 iterations,  
209 including 3,000 for warmup, and retained 2,000 samples for inference in estimating the  
210 selection parameter  $\beta$ . Weakly informative (truncated) normal priors were placed on  
211 the OU parameters, centered away from the true values, and a weakly informative nor-  
212 mal prior on  $\beta$ , centered on zero. See Appendix 2 for code containing details about the  
213 priors. The covariate that accounts for the OU movement process in estimating  $\beta$  (i.e.  
214  $-(\mathbf{x}_t - \boldsymbol{\mu}_t)' \boldsymbol{\Sigma}_t^{-1} (\mathbf{x}_t - \boldsymbol{\mu}_t) / 2$ ) was computed for each used and available point using the  
215 posterior means of  $\omega$  and  $\sigma^2$ .  $\beta$  was then estimated with an use-availability design and  
216 Bayesian logistic regression. For each parameter combination, we summarized the rela-  
217 tive biases of the posterior means and the proportion of tracks for which the 95% credible  
218 interval overlapped the true value for  $\beta$ ,  $\omega$ , and  $\sigma^2$ .

219 **Simulation Results** The proportions of 95% credible interval coverage were  $> 0.80$  for  
220 nearly all cases in estimates of  $\beta$  (three were  $> 0.70$ ) and generally high for  $\sigma^2$  and  $\omega$  as  
221 well (Figs. S1 & S2). The simulation to assure identifiability found high credible interval  
222 coverage ( $> 0.80$ ) as well. Thus, simulations generally found the two-step approach  
223 provided estimates of resource selection parameters  $\beta$  with no or minimal bias (Fig.  
224 2). Other use-availability designs have also been found to yield unbiased estimates of  
225 resource selection parameters (Lele and Keim, 2006; Forester et al., 2009; Avgar et al.,  
226 2016). Estimating the movement parameters  $\omega$  and  $\sigma^2$  yielded slightly more bias, but  
227 Johnson et al. (2008) had similar levels of bias when maximizing the joint likelihood for  
228 equation (5) rather than the simpler two-step procedure we describe.

## 229 Model extensions

230 **Multiple home range cores** An OU home range model can be extended to allow  
231 for multiple core areas, and each core can be allowed to have a unique set of movement  
232 patterns within an animal's broader home range (Johnson et al., 2008; Breed et al., 2017).  
233 One way to accomplish this is estimating transitions among  $K$  cores as a Markov process,

234 with a  $K \times K$  transition matrix  $\mathbf{\Gamma}$  describing the probability of the animal moving from  
235 one core to another (or remaining in the currently occupied core) during the time interval  
236  $t$  to  $t + 1$  (Breed et al., 2017). Note that to ensure the Markov assumptions hold, fixed  
237 and regular time intervals are required, which is common in most (but not all) types  
238 of telemetry data. If data are not regular, one can simply use an indexing approach to  
239 still incorporate multiple cores (*sensu* Johnson et al., 2008). We can also estimate the  
240 relationships between transition probabilities and habitat conditions or other covariates  
241 in a manner similar to multinomial logistic regression. Breed et al. (2017) estimated  
242 parameters associated with staying in a core area (i.e. the elements along the diagonal of  
243  $\mathbf{\Gamma}$ ); however, here we extend that to transitions among all cores. As these covariates can  
244 be temporally dynamic, we may denote our transition matrix as  $\mathbf{\Gamma}_t = (\gamma_{ij,t})$ . Employing  
245 the multinomial logit link, we can write the conditional probability that the animal is in  
246 the  $j$ th core at time  $t + 1$  given that it came from the  $i$ th core:

$$P(k_{t+1} = j | k_t = i) = \gamma_{ij,t} = \frac{\exp(\gamma_{ij,t}^*)}{\sum_{k=1}^K \exp(\gamma_{ik,t}^*)} \quad (7)$$

247 where  $\gamma_{ij,t}^* = \mathbf{s}'_{ij,t} \boldsymbol{\alpha}_{ij}$ .  $\mathbf{s}_{ij,t}$  is the vector of covariates associated with the core  $k_t =$   
248  $i$  at time  $t$ , and the vector  $\boldsymbol{\alpha}_{ij}$  weights those covariates by their effect on  $\gamma_{ij,t}$ . We  
249 could thus calculate  $\mathbf{\Gamma}_t$  for a set of core- and time-specific covariates. This is similar  
250 to modeling behavioral state transitions with a conventional hidden Markov Model for  
251 animal movement data (*sensu* Michelot et al., 2016), but the ‘states’ here are home range  
252 cores, each having a respective set of movement parameters (Breed et al., 2017).

253 Unsupervised estimation of the state transitions, which in Stan required marginalizing  
254 the latent discrete process, proved computationally impractical. We thus followed Breed  
255 et al. (2017) and implemented a  $k$ -means clustering algorithm to identify the number of  
256 home range core areas, the location of each core center  $\boldsymbol{\mu}_k$ , and the core transitions a  
257 priori (Hartigan and Wong, 1979). We then proceeded with supervised estimation of  $\boldsymbol{\alpha}$   
258 and assuming each  $\boldsymbol{\mu}_k$  known. We note that Johnson et al. (2008) also assumed a known  
259 core transition process. While we lose inference of uncertainty around core assignments  
260 and each  $\boldsymbol{\mu}_k$ , this problem has generally not been resolved in the literature and online

261 estimation remains a major hurdle.

262 Finally, the multicore OU position likelihood is given by

$$\mathbf{x}_t | \mathbf{x}_{t-\Delta t} \sim \mathcal{N} \left( \boldsymbol{\mu}_k + e^{-\boldsymbol{\Omega}_k \Delta t} (\mathbf{x}_{t-\Delta t} - \boldsymbol{\mu}_k), \boldsymbol{\Sigma} - e^{-\boldsymbol{\Omega}_k \Delta t} \boldsymbol{\Sigma}_k e^{-\boldsymbol{\Omega}_k' \Delta t} \right), \quad (8)$$

263 where  $\boldsymbol{\Omega}_k = \omega_k \mathbf{I}_2$  and  $\boldsymbol{\Sigma}_k = \sigma_k^2 \mathbf{I}_2$  for the  $k$ th home range core.

264 **Hierarchical inference across individuals** Full Bayesian inference about population  
265 level parameters can be obtained with the “Lunn method.” The Lunn method is a form of  
266 recursive Bayesian estimation and uses the marginal posteriors from a series of indepen-  
267 dent individual-level models fit with Markov chain Monte-Carlo (MCMC; or HMC) as  
268 the proposal distributions in a second stage MCMC algorithm (Lunn et al., 2013; Hooten  
269 et al., 2016; Hooten and Hefley, 2019). Here, to obtain population-level estimates of the  
270 population-level OU and core switching parameters, we can specify:

$$\begin{aligned} \boldsymbol{\alpha}_{mm,n} &\sim \mathcal{N}(\boldsymbol{\alpha}_{\text{pop}}, \boldsymbol{\Sigma}_\alpha) \\ \omega_n &\sim \mathcal{N}^+(\omega_{\text{pop}}, \sigma_\omega^2) \\ \sigma_n^2 &\sim \mathcal{N}^+(\sigma_{\text{pop}}^2, \sigma_\sigma^2), \end{aligned} \quad (9)$$

271 where  $\boldsymbol{\alpha}_{mm,n}$  is the vector of coefficients correlating the core-switching covariates with  
272 staying in the  $n$ th individual’s most used core  $m$ , and  $\boldsymbol{\Sigma}_\alpha$  is a diagonal matrix of the  
273 among-individual variances for each covariate. It is convenient to restrict inference about  
274  $\boldsymbol{\alpha}_{\text{pop}}$  to the most-used core because individuals can have different numbers of core areas.  
275 Normal priors on each element of  $\boldsymbol{\alpha}_{\text{pop}}$ , truncated normal priors on  $\omega_{\text{pop}}$  and  $\sigma_{\text{pop}}$ , and  
276 inverse gamma priors on all among-individual (random effect) variances are conjugate  
277 priors and permit Gibbs updates for all population-level parameters. The individual-  
278 level parameters still require Metropolis-Hastings (MH) updates within the second stage  
279 algorithm, but these are straightforward because the MH ratios do not depend on the  
280 data (i.e. the data models cancel in the ratio; Lunn et al., 2013; Hooten et al., 2016;

281 Hooten and Hefley, 2019).

## 282 Application

283 **Model system.** Golden eagles are a long-lived, territorial raptor that reach sexual  
284 maturity entering their third breeding season (Kochert et al., 2002; Watson, 2010). They  
285 most commonly nest on cliffs, or less commonly large trees, and are generally central place  
286 foragers (Kochert et al., 2002; Watson, 2010). Eagles with established territories where a  
287 nest is a central place surrounded by uniformly average landscape should be expected to  
288 range and use space in a circular pattern around the nest. Because real landscapes are not  
289 uniform, an eagle's realized space use would then be shaped by the habitat surrounding  
290 that central point. Primary prey of golden eagles nesting in Alaska are snowshoe hare  
291 *Lepus americanus*, ptarmigan *Lagopus* spp., and Arctic ground squirrel *Urocitellus parryii*  
292 (McIntyre and Adams, 1999; McIntyre and Schmidt, 2012; Herzog et al., 2019).

293 When a pair of eagles initiate a nesting attempt, the male does the majority of the  
294 provisioning, while the female tends the nest and does most of the incubating and brood-  
295 ing of eggs/nestlings. When nestlings mature to the point that they can thermoregulate  
296 ( $\sim 3$  wk post-hatch; or when a nest fails), the adult female no longer needs to tend them  
297 as regularly, so she is free to move about the territory and aid in provisioning (Watson,  
298 2010). We expect that this event should be commensurate with an abrupt change in space  
299 use, because nest-tending requirements suddenly become less restrictive. This might al-  
300 low space use to change so that the male and female of the breeding pair partition space  
301 to minimize overlap in foraging areas and/or territory defense efforts. It is also possible  
302 that this might occur dynamically throughout the season and/or day, regardless of nest  
303 tending duties.

304 Another key characteristic of golden eagles that would be expected to strongly in-  
305 fluence how they use space is their flight mechanics—they are a soaring bird capable  
306 of capturing dynamic air currents to decrease or completely offset the energetic costs of  
307 flight (Katzner et al., 2012; Watson, 2010). Consequently, their space use patterns, and  
308 possibly partitioning of space among individuals, will be shaped dynamically by weather

309 variables (Eisaguirre et al., 2020). Two common forms of such flight subsidies are thermal  
310 uplift, caused by the sun heating the surface of the earth and causing air to rise, and  
311 orographic uplift, caused by wind blowing up slope.

312 Because habitat and weather features are non-uniform around nest sites/central places,  
313 eagles (and other animals) can establish multiple core areas within their larger home  
314 range. Thus real home ranges are not a single circular distribution in a homogeneous  
315 landscape, but multiple cores shaped by the non-uniform distribution of food and energy  
316 subsidies.

317 **Telemetry data** We captured golden eagles with a remote-fired net launcher placed  
318 over carrion bait near Gunsight Mountain, Alaska (61.67°N 147.35°W). Captures occurred  
319 during spring migration, mid-March to mid-April 2016. Adult eagles were equipped  
320 with 45-g back pack solar-powered Argos/GPS platform transmitter terminals (PTTs;  
321 Microwave Telemetry, Inc., Columbia, MD, USA). PTTs were programmed to record a  
322 GPS location every other hour, yielding 12 fixes per day. Eagles were sexed molecularly  
323 and aged by plumage. See Eisaguirre et al. (2018) or Eisaguirre et al. (2019) for additional  
324 details.

325 **Selection covariates** We used the Alaska Center for Conservation Science Alaska Veg-  
326 etation and Wetland Composite (AKVWC; 30-m resolution) data for characterizing habi-  
327 tat type. We collapsed the numerous habitat types in the dataset into eight for this anal-  
328 ysis. These were shrub, open (e.g., meadows and open tundra), bare, forest, wet (e.g.,  
329 marsh), water, ice (i.e. perennial snow and ice), and human. See Appendix 1 for details.

330 Elevation data were gathered using the Mapzen Terrain Service with the `elevatr`  
331 package (Hollister and Shah, 2018). We specified the ‘zoom’ variable such that the  
332 resolution closely matched that of the habitat data. We included elevation and slope  
333 ( $slope \in [0, \pi/2]$  radians) as predictors in the model.

334 We used a state-wide data set of snow-off date (date of which an area became snow  
335 free) to derive a dynamic binary indicator variable of whether or not grid cells were free  
336 of snow (Macander et al., 2015). While one might expect some confounding between the

337 (perennial) snow and ice habitat variable and this snow indicator, it would be limited  
338 due to few glaciated and perennial snow-covered areas frequented by the eagles sampled.

339 The remaining variables included in the model were related to orographic and thermal  
340 uplift and were derived from the National elevation data and Center for Environmental  
341 Predictions (NCEP) North American Regional Reanalysis (NARR) data. Angle of inci-  
342 dence ( $aoi$ ) was included for the effect of orographic uplift on eagle space use. It is the  
343 deviation of the relative wind from the aspect of a slope and was computed such that  
344  $aoi \in [0, \pi]$  (Murgatroyd et al., 2018);  $\pi/2$  corresponds to a wind orthogonal to a slope's  
345 aspect, and  $\pi$  to a wind perfectly parallel to a slope's aspect thus blowing directly up  
346 slope. Wind direction was computed trigonometrically from the meridional and zonal  
347 wind components estimated by the NCEP NARR 10 m above the surface.

348 The effect of thermal uplift was included with a hill shade variable. Hill shade was  
349 computed following Murgatroyd et al. (2018), such that  $hs \in [0, 1]$ , where  $hs = 1$  is  
350 direct sun (most thermal uplift) and  $hs = 0$  no sun (no thermal uplift). We gathered  
351 the required location-, date-, and time-specific azimuth and zenith of the sun using the  
352 package `maptools` (Bivand and Lewin-Koh, 2016).

353 **Core switching covariates.** We also included wind variables as covariates in the core  
354 transition process. We expected that certain wind directions and/or magnitudes might  
355 make certain home range cores more or less favorable. So, the cosine and sine of wind  
356 direction were included in addition to wind magnitude as covariates in equation (7). As  
357 above, these were computed trigonometrically from the NCEP NARR data specific to  
358 each home range core. Among-core distance was also included as a covariate to account  
359 for more frequent transitions to closer cores.

360 **Estimation and inference** To illustrate our approach, we used only data from eagles  
361 that were clearly defending territories in 2016. This included six males and six females,  
362 all aged to their fifth year or older. None of these eagles were members of the same  
363 breeding pair. Aerial surveys flown in June 2016 revealed that four of the eagles had  
364 young (at the time of the survey), and, with the exception of one nest site that was not

365 surveyed, the others showed signs of reproductive attempts.

366 Individual-level marginal posteriors of the core switching and OU process parameters  
367 were obtained using Stan (Stan Development Team, 2018). We used three chains of 5,000  
368 iterations, including 2,000 for warmup, retaining every third sample for a total of 3,000  
369 samples. These were then used as proposed values for the MH updates in the second stage  
370 for estimating parameters in equation (9). The population-level selection coefficients  $\beta$   
371 were estimated with the empirical Bayes procedure with a Bayesian hierarchical logistic  
372 regression model in Stan (default normal priors; Stan Development Team, 2016), using  
373 marginal posterior predictive samples as available points, as in the simulations above.  
374 Convergence to the posterior was checked with trace plots and Gelman diagnostics (Stan  
375 Development Team, 2018). Stan and R code for fitting the individual-level OU process  
376 and sampling from the conditional posterior predictive distributions, as well as R code  
377 for the second stage MCMC algorithm, are provided in Appendix 2.

378 As our primary interest was in differences between male and female eagles in early  
379 and late breeding season, we wanted parameter estimates specific to each sex and to early  
380 and late breeding season. To keep computing time more reasonable, we fit the model  
381 separately and in parallel (on multiple CPU cores) for these periods as well as for each  
382 sex. Aerial observations of the nests of the tagged eagles indicated that 20 June was on  
383 average the approximate date when nestlings should have been of age to thermoregulate,  
384 so we used this date to partition the data between early and late breeding season.

385 Utilization distributions were computed according to equation (6). The probability  
386 density predicted for each home range core was weighted by the number of eagle locations  
387 in that core prior to computing the 95% volume contour of the space use distributions,  
388 which we used to estimate home range boundaries (Hooten et al., 2017).



## 389 Results

### 390 Movement parameters

391 Because individuals had differing numbers of home range cores, we present here only the  
392 OU movement parameters from the individuals' most heavily used core. We found a  
393 slight increase in centralizing tendency for males (Fig. 3) and an increase in the number  
394 of home range cores for both sexes from early to late breeding season (Fig. S3). We  
395 found a weak effect of stronger wind correlating with females staying in their most-used  
396 (nesting) core and wind direction affecting males' propensity to stay within that core  
397 during early breeding season (Fig. 3).

### 398 Habitat selection

399 We present the effects of the most relevant habitat types in figure 4, which comprised  
400 > 99% of the space used (see figure S5 in Appendix 1 for all habitat types). Both male  
401 and female eagles weakly selected against forested areas during early breeding season,  
402 and females selected against shrub and open habitats early, relative to bare areas (Fig.  
403 4). Overall, males and females used similar terrain, though there was some evidence that  
404 females used slightly steeper slopes (Fig. S4).

### 405 Energy landscape

406 In early breeding season, before nestling thermoregulation or nest failure, males and  
407 females appeared to select energy landscape features similarly (Fig. 5–7). During late  
408 breeding season, male and female eagles appeared to partition the landscape dynamically  
409 based on components of the energy landscape (Fig. 5–7). Males tended to use areas with  
410 more orographic uplift (i.e. higher angle of incidence; Fig. 5), while females used more  
411 thermal uplift (i.e. greater hill shade; Fig. 5). This pattern resulted from males and  
412 females selecting dynamic energy subsidy features over the landscape differently (Fig. 6).  
413 Further, females showed essentially no selection for or against angle of incidence during  
414 late breeding season (Fig. 5 & 6). The posterior probability that females selected more

415 strongly for hill shade than males was 0.94, and the posterior probability that males  
416 selected more strongly for higher angle of incidence than females was 0.82 (Fig. 6).  
417 These probabilities were computed relative to the posterior mean for the opposite sex  
418 with Monte Carlo integration.

## 419 **Discussion**

420 Here, we demonstrated a method that overcomes analytical and computational challenges  
421 in fitting a hierarchical mechanistic home range model to data but also, as we showed  
422 through a simulation study, provides unbiased inference about biologically interpretable  
423 parameters. The OU space use model allows inference about movement behavior, resource  
424 selection, and, ultimately, space use patterns, and it is applicable to any central place  
425 animal. Further, we demonstrated that this approach can be extended to account for  
426 additional complexity in the structure of animal home ranges—in the form of multiple  
427 core areas—and possible covariates affecting transitions within that structure. Applying  
428 the model to real data offered novel insight into the movement and space use of an  
429 organism that is sensitive to its central place, landscape resources, and energy subsidies  
430 available in a fluid atmosphere.

### 431 **Application to the energy home range**

432 Applying the OU space use model to territorial golden eagle movement revealed some  
433 notable patterns. First, male and female eagles had relatively similar space use patterns  
434 during early breeding season, followed by a shift at the approximate time of a particular  
435 phenological event. When nestlings are able to thermoregulate, the female of a pair can  
436 take on additional duties (i.e. provisioning and territorial defense). Our results show this  
437 coincides with a change in space use, emergent from changes in both resource selection  
438 and movement behavior.

439 Male and female eagles partitioned their use of orographic and thermal uplift during  
440 late breeding season (Fig. 5 & 7). Two possible explanations for this are that it (1)

441 serves as a means for each sex to avoid overlap in foraging and/or territory defense efforts  
442 and/or (2) is an emergent pattern resulting from size dimorphism. Reverse sexual size  
443 dimorphism is prevalent in raptors, and it is coupled with dimorphism in wing loading (i.e.  
444 wing area per body mass): Females of many raptors, including golden eagle, exhibit higher  
445 wing loading than males (Lish et al., 2016). Lighter wing loading could allow male eagles  
446 to capitalize on even slight bits of uplift generated orographically with more energetic  
447 efficiency than females. Thermal uplift is also generally a more efficient flight subsidy  
448 than orographic uplift (Duerr et al., 2012), so, given their higher wing loading, it is likely  
449 energetically advantageous for females to use primarily thermal soaring. Similar patterns  
450 have been recently shown in sexually size dimorphic wandering albatrosses *Diomedea*  
451 *exulans*, where males—the sex with higher wing loading—favor flight in more energetically  
452 favorable wind conditions than females (Clay et al., 2020).

453 Our results also suggest that soaring birds could dynamically segregate space verti-  
454 cally, as well as partition activity budgets. Orographic uplift is typically available at only  
455 relatively low heights above Earth’s surface, whereas thermals can travel much higher  
456 into the atmospheric boundary layer. The altitude of eagles using these different types  
457 of uplift follows suit (Katzner et al., 2015). Given selection for differing types of uplift,  
458 we would thus expect male and female eagles might also partition their home ranges  
459 vertically. Maintaining good visibility with the surface is required for successful forag-  
460 ing, so partitioning thermal and orographic uplift could also indicate different behavioral  
461 budgets. Further, thermal and orographic uplift vary over space following changes in  
462 wind and sun angle. Consequently, males and females may partition three dimensional  
463 space and activities temporally through the day, as females await better thermal soaring  
464 conditions before beginning extensive movements around the home range. In contrast,  
465 wind can generate orographic uplift at any time during the day.

466 While our findings relating to the energy landscape were most notable, we also found  
467 some differences in habitat and terrain use, which are consistent with sex-specific roles  
468 during the breeding season. Females used and selected steeper slopes than males, con-  
469 sistent with nesting behavior and perching near the nest (Collopy and Edwards, 1989;

470 Kochert et al., 2002; Watson, 2010). Not surprisingly, females used less steep slopes dur-  
471 ing late breeding season, compared to early, consistent with behavior in the later nestling  
472 stages of breeding (Collopy and Edwards, 1989; Watson, 2010). Also, males, who do  
473 most of the provisioning even late into the breeding season (Collopy and Edwards, 1989;  
474 Watson, 2010), selected more strongly for shrub and open habitats (Fig. 4), which would  
475 likely be used for hunting. During late breeding season, females' selection for shrub  
476 habitats approached that of bare areas, likely following an increased role in provisioning.

## 477 **Modeling central place space use**

478 Our modelling approach is conceptually framed around the elastic disc hypothesis, an  
479 analogy underlying central place theory, and it shares and integrates aspects of a number  
480 of other methods. It is analytically similar to the general frameworks presented by John-  
481 son et al. (2008) and Christ et al. (2008); however, it overcomes estimation difficulties by  
482 implementing the model analogously to common RSF and SSF approaches (Manly et al.,  
483 2002; Forester et al., 2009; Avgar et al., 2016; Hooten et al., 2017). Computationally,  
484 it is far simpler to implement but produces similar parameter estimates and biological  
485 inference. Additionally we extended the model to the cases where covariates may drive  
486 the use of multiple home range core areas and population-level inference across multi-  
487 ple individuals (i.e. partial pooling) is needed. Further, we demonstrated how recursive  
488 Bayesian estimation can be particularly useful in estimating complex, computationally  
489 demanding hierarchical movement models (Lunn et al., 2013; Hooten et al., 2016; Hooten  
490 and Hefley, 2019; Hooten et al., 2019).

491 The OU space use model, as we and others have shown, yields unbiased inference  
492 about resource selection parameters (Johnson et al., 2008). This is despite inherent  
493 identifiability issues in studying the movement of central place animals. That is, it is  
494 difficult to identify whether an animal uses its central place disproportionately to other  
495 space because (1) it must tend the central place, (2) there is favorable habitat there,  
496 or (3) some combination of both. Unfortunately, this can bias some of the movement  
497 parameter estimates (Fig. S1 & S2 Johnson et al., 2008); however, evidence suggests

498 this occurs in only select cases (i.e. when spatial autocorrelation and selection are very  
499 high; Fig. S1 & S2; Johnson et al., 2008). Bias in  $\hat{\sigma}$  is potentially problematic because  
500 it additionally biases estimation of home range size. However, we found that this occurs  
501 when  $\beta$  and spatial autocorrelation are particularly high (Fig. S2)—higher than what  
502 we estimated in our application to real data (Fig. 4 & 6).

503 A tempting way of accounting for central places within conventional RSF and SSF  
504 approaches is to simply include ‘distance to central place’ in  $\psi(\mathbf{z})$ . However, this assumes  
505 the central place is some feature of the landscape  $\mathbf{z}$ , which is problematic for two reasons.  
506 First, it is inconsistent with central place behavior. The central place fundamentally  
507 modifies the animal’s behavior and space use; the animal does not actively select the  
508 central place as a resource while moving within its home range. Second, the selection  
509 coefficient  $\beta$  weighting this distance covariate would be biased high, as the central place  
510 is inappropriately discounted in  $f_a(\mathbf{z})$ , leaving  $\beta$  as the only parameter to make up for  
511 the disproportionate space use at the central point. In contrast, the OU space use model  
512 incorporates the central place such that it is an element on the landscape that modifies  
513  $f_a(\mathbf{z})$ —the animal’s movement and behavior.

514 The OU process can be presented as an advection-diffusion equation, as in equation  
515 (1); however, its properties are somewhat unique (Blackwell, 1997). Various other forms of  
516 advection-diffusion equations can also be used to mechanistically model home ranges and  
517 territories with central place dynamics (Moorcroft and Lewis, 2006), and these have been  
518 formally reconciled with resource selection analyses (Moorcroft and Barnett, 2008). Due  
519 to equation (6), however, when the OU process is integrated into the weighted distribution  
520 framework, steady state space use (or utilization) distributions are straightforward to  
521 compute. If we were to use an advection-diffusion process other than an OU process  
522 (e.g., different biased random walk or correlated random walk), computationally-intensive  
523 numerical investigation of the so-called master equation or simulations would be required  
524 (Moorcroft and Lewis, 2006; Barnett and Moorcroft, 2008; Potts et al., 2012, 2014a,b,c;  
525 Potts and Lewis, 2014; Signer et al., 2019). With our approach, it is therefore much more  
526 straightforward to visualize the effects of dynamic resources on space use over hypothetical

527 and/or real landscapes (Fig. 7).

## 528 **Conclusions**

529 Here we show that estimating a hierarchical mechanistic space use model is relatively  
530 flexible and can be eased by breaking into stages without sacrificing inference. While  
531 our approach is not without shortcomings—primarily discounting uncertainty in some  
532 components—we believe it is a step towards practical implementation of more complex  
533 movement and resource selection models that can improve our understanding of animal  
534 movement ecology. Our application provides evidence of dynamic sex-specific partitioning  
535 of the energy landscape within home ranges, as well as movement and habitat selection  
536 patterns consistent with eagle biology. While the model works most naturally with central  
537 place animals, the ability to incorporate multiple home range cores and the range of  
538 movement and space use patterns that can be captured with the OU parameters make it  
539 broadly applicable.

## 540 **Acknowledgements**

541 T. & D. Hawkins, M. Kohan, B. Robinson, and many others provided support in the field,  
542 and J. Liguori and N. Paprocki helped age eagles. R. Barry, J. McIntyre, M. Short, and  
543 L. Berman provided helpful comments on a draft of the manuscript. To these friends, we  
544 are most grateful. Additionally, we thank two anonymous reviewers who helped greatly  
545 improve the manuscript. Funding was provided by the Alaska Department of Fish &  
546 Game (ADF&G) through the federal State Wildlife Grant Program. JME was supported  
547 by the Calvin J. Lensink Fund during part of the project.

## 548 **Data accessibility**

549 All movement data used for this manuscript are archived in the online repository Move-  
550 bank (<https://www.movebank.org/>; ID 17680093). The data contain information con-  
551 sidered confidential and sensitive by the State of Alaska (State Statute 16.05.815(d)), but

552 they could be made available for research at the discretion of the Alaska Department of  
553 Fish & Game.

## 554 References

555 Avgar T, Potts JR, Lewis MA, Boyce MS. 2016. Integrated step selection analysis:  
556 Bridging the gap between resource selection and animal movement. *Methods in Ecology*  
557 *and Evolution* **7**: 619–630. doi: 10.1111/2041-210X.12528.

558 Barnett AH, Moorcroft PR. 2008. Analytic steady-state space use patterns and rapid  
559 computations in mechanistic home range analysis. *Journal of Mathematical Biology*  
560 **57**: 139–159. doi: 10.1007/s00285-007-0149-8.

561 Bivand R, Lewin-Koh N. 2016. maptools: Tools for Reading and Handling Spatial Ob-  
562 jects.  
563 URL <https://cran.r-project.org/package=maptools>

564 Blackwell PG. 1997. Random diffusion models for animal movement. *Ecological Modelling*  
565 **100**: 87–102. doi: 10.1016/S0304-3800(97)00153-1.

566 Breed GA, Golson EA, Tinker MT. 2017. Predicting animal home-range structure and  
567 transitions using a multistate Ornstein-Uhlenbeck biased random walk. *Ecology* **98**:  
568 32–47. doi: 10.1002/ecy.1615.

569 Burt WH. 1943. Territoriality and home range concepts as applied to mammals. *Journal*  
570 *of Mammalogy* **24**: 346–352. doi: 10.2307/1374834.

571 Christ A, Hoef JV, Zimmerman DL. 2008. An animal movement model incorporating  
572 home range and habitat selection. *Environmental and Ecological Statistics* **15**: 27–38.  
573 doi: 10.1007/s10651-007-0036-x.

574 Clay TA, Joo R, Weimerskirch H, Phillips RA, den Ouden O, Basille M, Clusella-Trullas  
575 S, Assink JD, Patrick SC. 2020. Sex-specific effects of wind on the flight decisions of

- 576 a sexually dimorphic soaring bird. *Journal of Animal Ecology* **89**: 1811–1823. doi:  
577 10.1111/1365-2656.13267.
- 578 Collopy M, Edwards T. 1989. Territory Size, Activity Budget, and Role of Undulating  
579 Flight in Nesting Golden Eagles. *Journal of Field Ornithology* **60**: 43–51.
- 580 Duerr AE, Miller TA, Lanzone M, Brandes D, Cooper J, O'Malley K, Maisonneuve C,  
581 Tremblay J, Katzner T. 2012. Testing an emerging paradigm in migration ecology  
582 shows surprising differences in efficiency between flight modes. *PLoS ONE* **7**: e35548.  
583 doi: 10.1371/journal.pone.0035548.
- 584 Dunn JE, Gipson PS. 1977. Analysis of radio telemetry data in studies of home range.  
585 *Biometrics* **33**: 85–101.
- 586 Eisaguirre JM, Auger-Méthé M, Barger CP, Lewis SB, Booms TL, Breed GA. 2019.  
587 Dynamic-parameter movement models reveal drivers of migratory pace in a soaring  
588 bird. *Frontiers in Ecology and Evolution* **7**: 317. doi: 10.3389/fevo.2019.00317.
- 589 Eisaguirre JM, Booms TL, Barger CP, Lewis SB, Breed GA, Fish US, Service W. 2020.  
590 Novel step selection analyses on energy landscapes reveal how linear features alter  
591 migrations of soaring birds. *Journal of Animal Ecology* : 1–64doi: 10.1111/1365-  
592 2656.13335.
- 593 Eisaguirre JM, Booms TL, Barger CP, McIntyre CL, Lewis SB, Breed GA. 2018. Local  
594 meteorological conditions reroute a migration. *Proceedings of the Royal Society B* **285**:  
595 20181779.
- 596 Forester JD, Im HK, Rathouz PJ. 2009. Accounting for animal movement in estimation  
597 of resource selection functions: sampling and data analysis. *Ecology* **90**: 3554–3565.
- 598 Fortin D, Beyer HL, Boyce MS, Smith DW, Duchesne T, Mao JS. 2005. Wolves influ-  
599 ence elk movements: behavior shapes a trophic cascade in Yellowstone National Park.  
600 *Ecology* **86**: 1320–1330. doi: 10.1890/04-0953.



- 601 Getty T. 1981. Analysis of central-place space-use patterns: the elastic disc revisited.  
602 *Ecology* **62**: 907–914. doi: 10.2307/1936988.
- 603 Hartigan J, Wong M. 1979. Algorithm AS 136: A K-Means Clustering Algorithm. *Applied*  
604 *Statistics* **28**: 100–108. doi: 10.2307/2346830.
- 605 Herzog J, Eisaguirre JM, Linkhart B, Booms TL. 2019. Golden eagle diet in western  
606 Alaska. *Journal of Raptor Research* **53**: 393–401. doi: 10.3356/0892-1016-53.4.393.
- 607 Hollister J, Shah T. 2018. elevatr: access elevation data from various APIs.  
608 URL <https://cran.r-project.org/package=elevatr>
- 609 Hooten MB, Buderman FE, Brost BM, Hanks EM, Ivan JS. 2016. Hierarchical animal  
610 movement models for population-level inference. *Environmetrics* **27**: 322–333. doi:  
611 10.1002/env.2402.
- 612 Hooten MB, Hanks EM, Johnson DS, Alldredge MW. 2014. Temporal variation and scale  
613 in movement-based resource selection functions. *Statistical Methodology* **17**: 82–98. doi:  
614 10.1016/j.stamet.2012.12.001.
- 615 Hooten MB, Hefley TJ. 2019. *Bringing Bayesian models to life*. Boca Raton: CRC Press.
- 616 Hooten MB, Johnson DS, Brost BM. 2019. Making Recursive Bayesian Inference Acces-  
617 sible. *The American Statistician* doi: 10.1080/00031305.2019.1665584.
- 618 Hooten MB, Johnson DS, McClintock BT, Morales JM. 2017. *Animal movement: statis-*  
619 *tical models for telemetry data*. New York: CRC Press.
- 620 Huxley J. 1934. A natural experiment on territorial instinct. *British Birds* **27**: 270–277.
- 621 Johnson DS, Hooten MB, Kuhn CE. 2013. Estimating animal resource selection from  
622 telemetry data using point process models. *Journal of Animal Ecology* **82**: 1155–1164.  
623 doi: 10.1111/1365-2656.12087.
- 624 Johnson DS, Thomas DL, Ver Hoef JM, Christ A, Service F. 2008. A general framework  
625 for the analysis of animal resource selection from telemetry data. *Biometrics* **64**: 968–  
626 976. doi: 10.1111/j.1541-0420.2007.00943.x.

- 627 Katzner TE, Brandes D, Miller T, Lanzone M, Maisonneuve C, Tremblay JA, Mulvihill  
628 R, Merovich GT. 2012. Topography drives migratory flight altitude of golden eagles:  
629 implications for on-shore wind energy development. *Journal of Applied Ecology* **49**:  
630 1178–1186. doi: 10.1111/j.1365-2664.2012.02185.x.
- 631 Katzner TE, Turk PJ, Duerr AE, Miller TA, Lanzone MJ, Cooper JL, Brandes D, Trem-  
632 blay JA, Lemaître J. 2015. Use of multiple modes of flight subsidy by a soaring ter-  
633 restrial bird, the golden eagle *Aquila chrysaetos*, when on migration. *Journal of Royal*  
634 *Society Interface* **12**: 20150530. doi: 10.1098/rsif.2015.0530.
- 635 Kochert MN, Steenhof K, McIntyre CL, Craig EH. 2002. Golden Eagle (*Aquila chrysaet-*  
636 *os*). In Poole A (ed.) *The Birds of North America*. Ithaca: Cornell Lab of Ornithology.
- 637 Lele S, Keim J. 2006. Weighted distributions and estimation of resource selection prob-  
638 ability functions. *Ecology* **87**: 3021–3028. doi: 10.12968/ajmw.2019.0008.
- 639 Lish JW, Domenech R, Bedrosian BE, Ellis DH, Payton M. 2016. Wing Loading in North  
640 American Golden Eagles (*Aquila chrysaetos*). *Journal of Raptor Research* **50**: 70–75.  
641 doi: 10.3356/rapt-50-01-70-75.1.
- 642 Lunn D, Barrett J, Sweeting M, Thompson S. 2013. Fully Bayesian hierarchical mod-  
643 elling in two stages, with application to meta-analysis. *Journal of the Royal Statistical*  
644 *Society. Series C: Applied Statistics* **62**: 551–572. doi: 10.1111/rssc.12007.
- 645 Macander MJ, Swingley CS, Joly K, Reynolds MK. 2015. Landsat-based snow persis-  
646 tence map for northwest Alaska. *Remote Sensing of Environment* **163**: 23–31. doi:  
647 10.1016/j.rse.2015.02.028.
- 648 Manly BFJ, Lyman L, Thomas D, McDonald TL, Erickson W. 2002. *Resource selection by*  
649 *animals: statistical design and analysis for field studies*. Dordrecht: Kluwer Academic  
650 Publishers.
- 651 McIntyre CL, Adams LG. 1999. Reproductive characteristics of migratory Golden Eagles  
652 in Denali National Park, Alaska. *The Condor* **101**: 115–123. doi: 10.2307/1370452.

- 653 McIntyre CL, Schmidt JH. 2012. Ecological and environmental correlates of territory  
654 occupancy and breeding performance of migratory Golden Eagles *Aquila chrysaetos* in  
655 interior Alaska. *Ibis* **154**: 124–135. doi: 10.1111/j.1474-919X.2011.01181.x.
- 656 Michelot T, Langrock R, Patterson TA. 2016. moveHMM: an R package for the statistical  
657 modelling of animal movement data using hidden Markov models. *Methods in Ecology*  
658 *and Evolution* **7**: 1308–1315. doi: 10.1111/2041-210X.12578.
- 659 Moorcroft P, Lewis M. 2006. *Mechanistic home range analysis*. Princeton, NJ: Princeton  
660 University Press.
- 661 Moorcroft PR, Barnett A. 2008. Mechanistic home range models and resource selection  
662 analysis: a reconciliation and unification. *Ecology* **89**: 1112–1119. doi: 10.1890/06-  
663 1985.1.
- 664 Morales JM, Ellner SP. 2002. Scaling up animal movements in heterogeneous land-  
665 scapes: the importance of behavior. *Ecology* **83**: 2240–2247. doi: 10.1890/0012-  
666 9658(2002)083[2240:SUAMIH]2.0.CO;2.
- 667 Murgatroyd M, Photopoulou T, Underhill LG, Bouten W, Amar A. 2018. Where eagles  
668 soar: Fine-resolution tracking reveals the spatiotemporal use of differential soaring  
669 modes in a large raptor. *Ecology and Evolution* **8**: 6788–6799. doi: 10.1002/ece3.4189.
- 670 Nathan R, Getz WM, Revilla E, Holyoak M, Kadmon R, Saltz D, Smouse PE. 2008. A  
671 movement ecology paradigm for unifying organismal movement research. *Proceedings*  
672 *of the National Academy of Sciences* **105**: 19052–9. doi: 10.1073/pnas.0800375105.
- 673 Potts JR, Bastille-Rousseau G, Murray DL, Schaefer JA, Lewis MA. 2014a. Predicting  
674 local and non-local effects of resources on animal space use using a mechanistic step  
675 selection model. *Methods in Ecology and Evolution* **5**: 253–262. doi: 10.1111/2041-  
676 210X.12150.
- 677 Potts JR, Harris S, Giuggioli L. 2012. Territorial dynamics and stable home range for-  
678 mation for central place foragers. *PLoS ONE* **7**. doi: 10.1371/journal.pone.0034033.

- 679 Potts JR, Lewis MA. 2014. How do animal territories form and change? Lessons from  
680 20 years of mechanistic modelling. *Proceedings of the Royal Society B* **281**: 20140231.  
681 doi: 10.1098/rspb.2014.0231.
- 682 Potts JR, Mokross K, Lewis MA. 2014b. A unifying framework for quantifying the  
683 nature of animal interactions. *Journal of The Royal Society Interface* **11**: 20140333.  
684 doi: 10.1098/rsif.2014.0333.
- 685 Potts JR, Mokross K, Stouffer PC, Lewis MA. 2014c. Step selection techniques uncover  
686 the environmental predictors of space use patterns in flocks of Amazonian birds. *Ecology*  
687 *and Evolution* **4**: 4578–4588. doi: 10.1002/ece3.1306.
- 688 Prokopenko CM, Boyce MS, Avgar T. 2016. Characterizing wildlife behavioural responses  
689 to roads using integrated step selection analysis. *Journal of Applied Ecology* doi:  
690 10.1111/1365-2664.12768.
- 691 R Core Team. 2018. R: a language and environment for statistical computing.  
692 URL <https://www.r-project.org/>
- 693 Schlather M, Malinowski A, Oesting M, Boecker D, Storkorb K, Engelke S, Martini J,  
694 Ballani F, Moreva O. 2019. Simulation and analysis of random fields.  
695 URL [http://ms.math.uni-mannheim.de/de/publications/software/](http://ms.math.uni-mannheim.de/de/publications/software/randomfields)  
696 `randomfields`
- 697 Schooley RL, Wiens JA. 2004. Movements of cactus bugs: patch transfers, matrix resis-  
698 tance, and edge permeability. *Landscape Ecology* **19**: 801–810. doi: 10.1007/s10980-  
699 005-0093-2.
- 700 Shepard ELC, Wilson RP, Rees WG, Grundy E, Lambertucci SA, Vosper SB. 2013.  
701 Energy landscapes shape animal movement ecology. *The American Naturalist* **182**:  
702 298–312. doi: 10.1086/671257.
- 703 Signer J, Fieberg J, Avgar T. 2019. Animal movement tools (amt): R package for man-  
704 aging tracking data and conducting habitat selection analyses. *Ecology and Evolution*  
705 **9**: 880–890. doi: 10.1002/ece3.4823.

- 706 Stan Development Team. 2016. rstanarm: Bayesian applied regression modeling via Stan.  
707 R package version 2.13.1.
- 708 Stan Development Team. 2018. RStan: the R interface to Stan, Version 2.17.3.  
709 URL <http://mc-stan.org>
- 710 Watson J. 2010. *The Golden Eagle*. New Haven: Yale University Press, second edition.

## 711 Figures

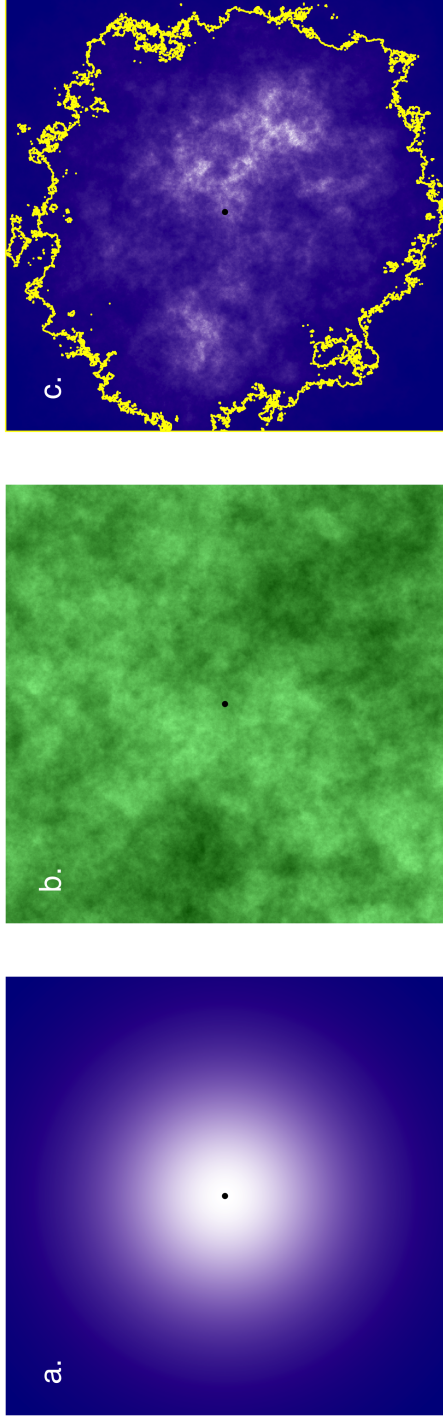

Figure 1: Example of computing the steady-state, analytical home range and space use distribution from an Ornstein-Uhlenbeck space use model. The movement-only, habitat-independent space use distribution (a) is modified by the habitat (b) and the animal's preferences for that habitat (i.e. a habitat weighting function), giving rise to a predicted space use distribution (c). Point is animal's center of attraction, and the polygon in c is the 95% volume contour of the space use distribution, representing an estimated home range boundary.

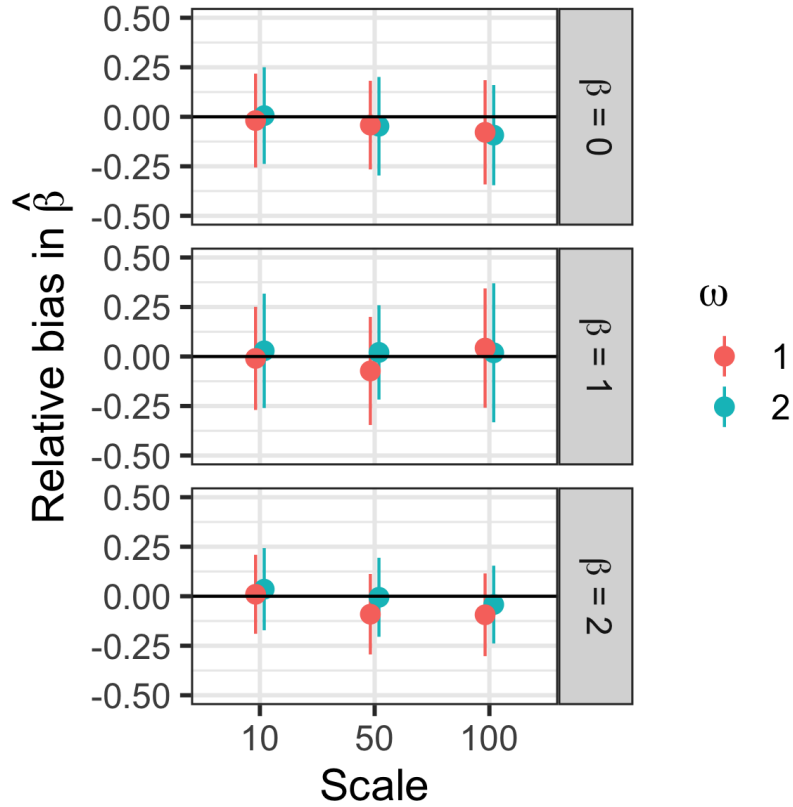

Figure 2: Summary of the relative bias in the selection coefficient  $\beta$  when estimated with an Ornstein-Uhlenbeck home range model with movement parameters estimated offline. The ‘scale’ parameter adjusts the level of spatial autocorrelation over the artificial landscape movements were simulated on, and  $\omega$  is a movement parameter. Points are the average of posterior means computed across 100 simulations  $\pm$  two standard deviations.

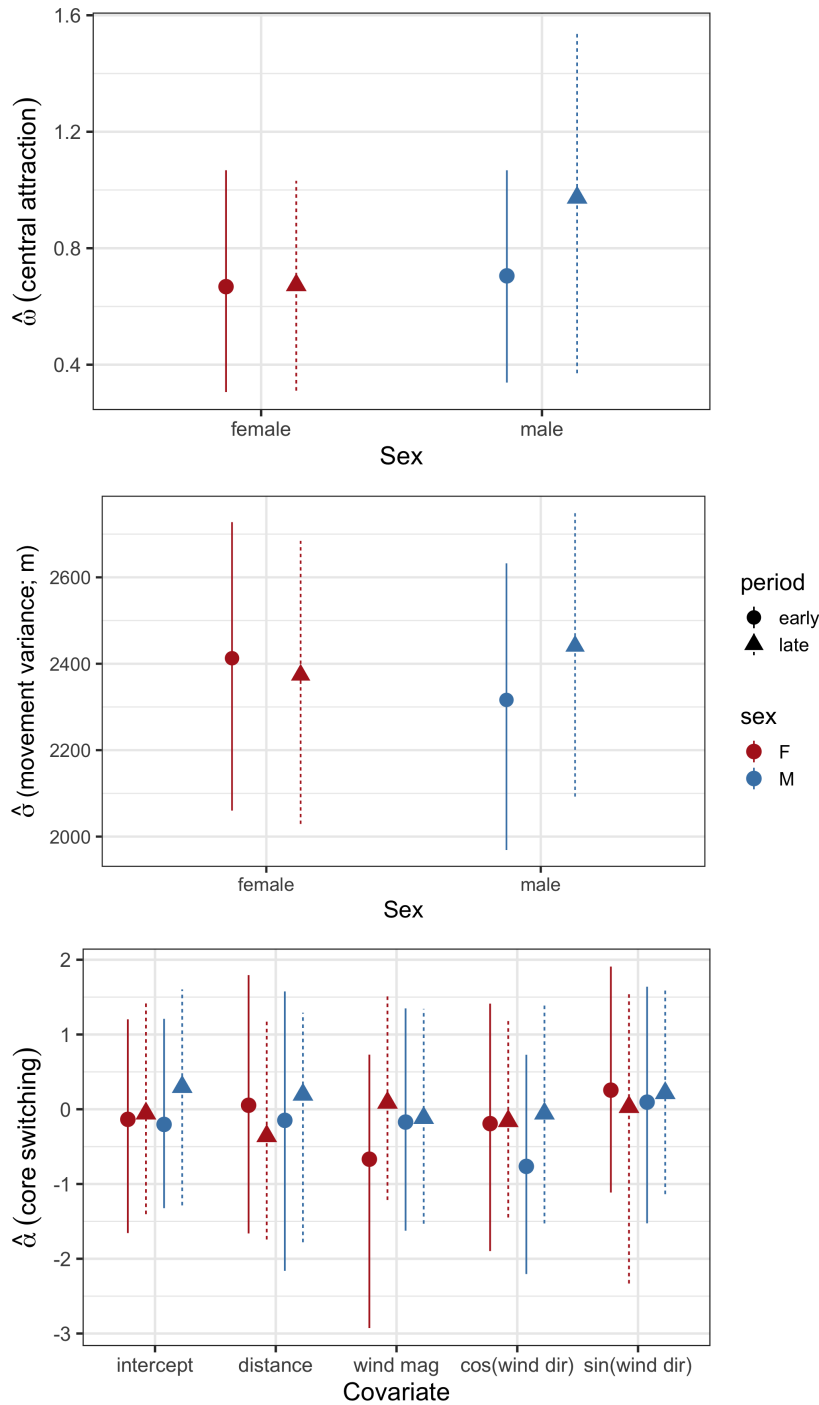

Figure 3: Posterior means and 90% credible intervals of the population-level movement parameters in an Ornstein-Uhlenbeck movement model fit to six male and six female golden eagles with territories in southcentral Alaska.  $\sigma$  is the movement variance;  $\omega$  the autocorrelation parameter measuring the centralizing tendency; and  $\alpha$  the coefficients in the Markovian home range core switching process correlating the covariates to staying in the most used home range core. The models were fit separately for early and late breeding season.



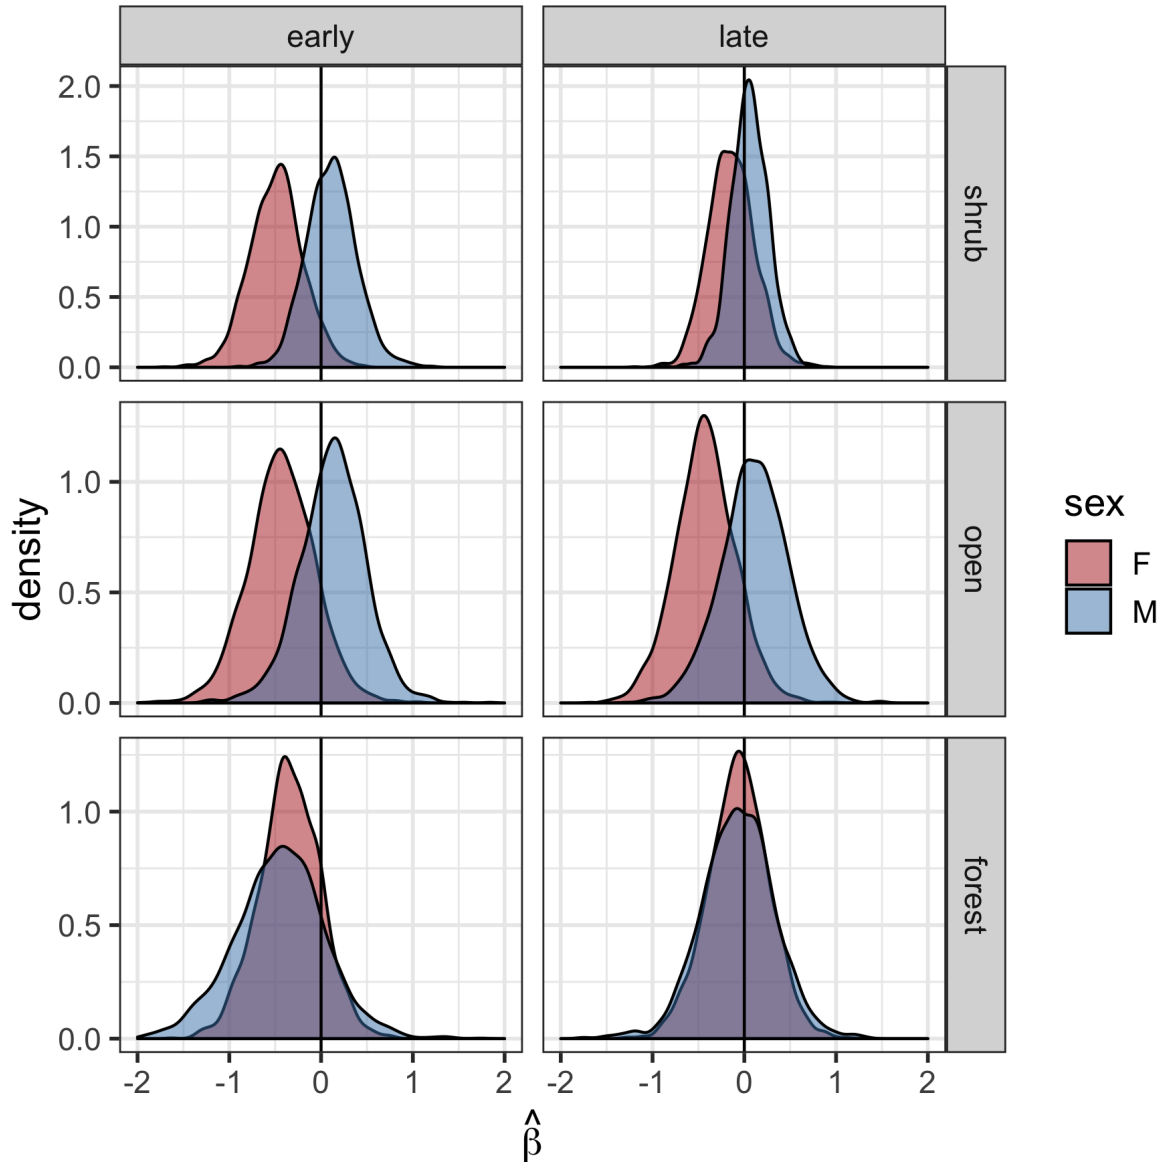

Figure 4: Marginal posterior densities of the population-level habitat selection parameters showing partitioning of certain habitat types by male and female golden eagles. These were estimated with an Ornstein-Uhlenbeck space use model for territorial golden eagles summering in southcentral Alaska. Densities were constructed with 2000 posterior samples. The reference category used for estimation was ‘bare’.

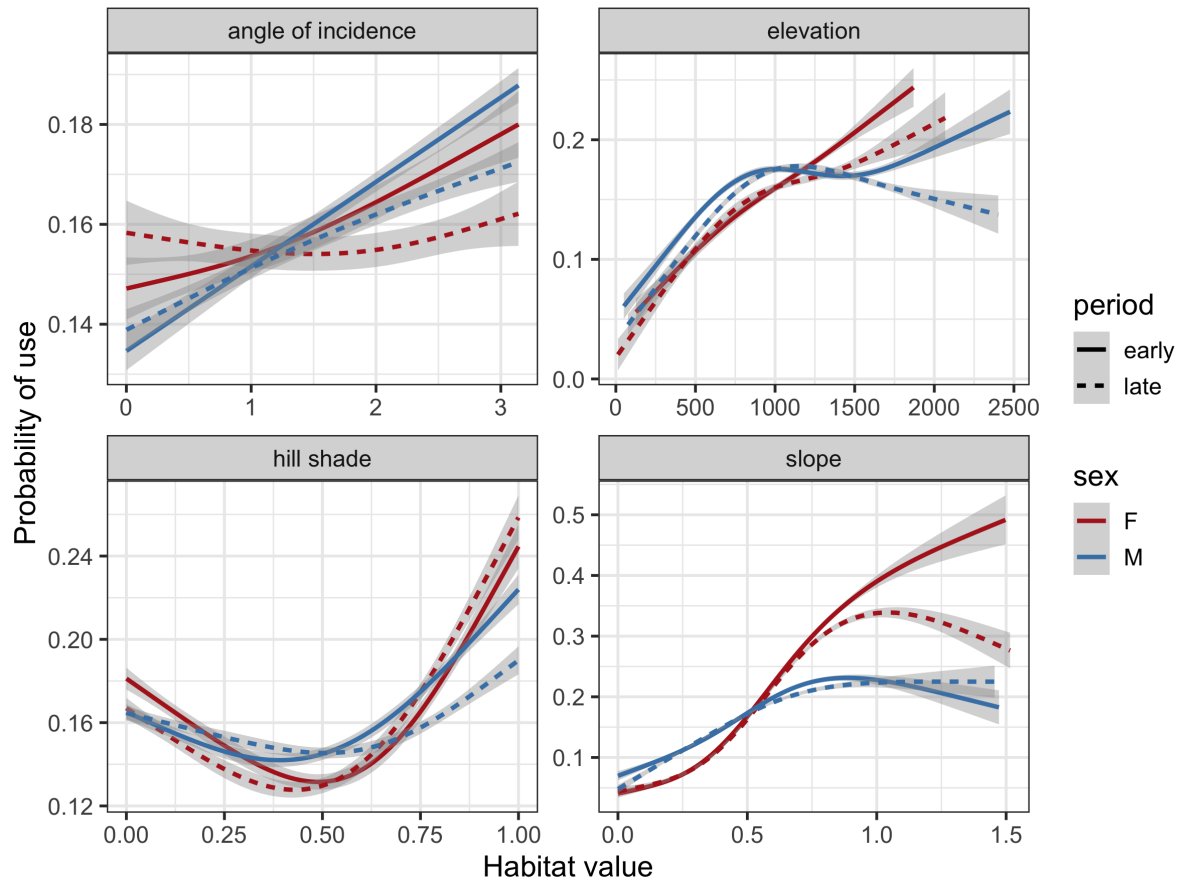

Figure 5: Probability of a golden eagle using a spatial location within its breeding season home range in southcentral Alaska as a function of habitat variables estimated with an Ornstein-Uhlenbeck (OU) space use model. This is the average effect conditioned on the space available to each eagle characterized by an OU biased random walk. The model was fit separately for early and late breeding season and for each sex. Predictions were smoothed over the availability points with a generalized additive model ( $df = 4$ ) and ribbons are 95% confidence intervals. Units are radians for angle of incidence and slope, and meters for elevation. Higher hill shade corresponds to more direct sun and greater thermal uplift potential. We present a version of this figure with common  $y$ -axis scales in Appendix 1.

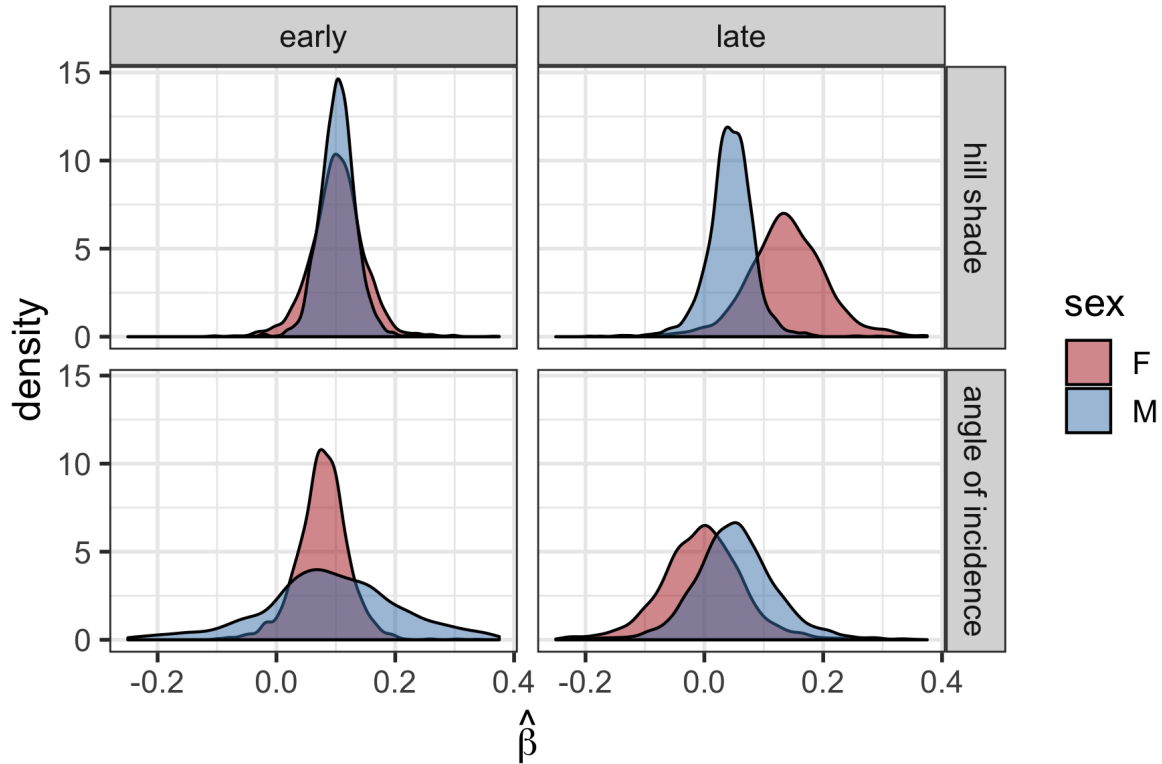

Figure 6: Marginal posterior densities of population-level hill shade and angle of incidence selection parameters showing partitioning of the energy landscape (thermal and orographic uplift) by male and female golden eagles during late breeding season. These were estimated with an Ornstein-Uhlenbeck space use model for territorial golden eagles summering in southcentral Alaska. Densities were constructed with 2000 posterior samples.

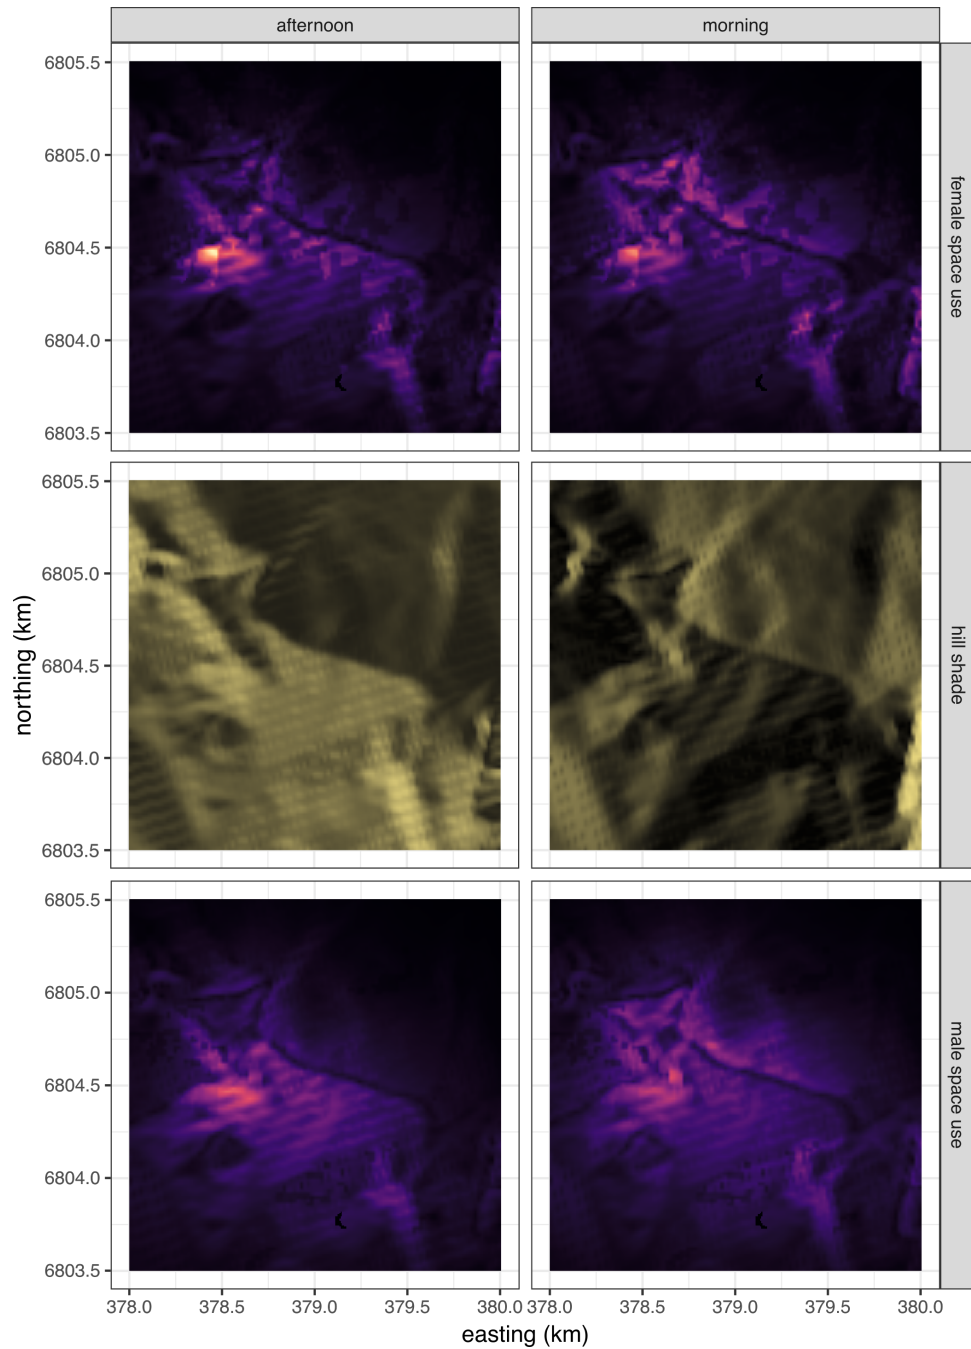

Figure 7: Hill shade maps and utilization distributions  $f_u(\mathbf{z}_{t^*})$  predicted from the Ornstein-Uhlenbeck space use model for territorial golden eagles summering in south-central Alaska. Predictions were made over a characteristic landscape  $\mathbf{z}_{t^*}$  during morning and afternoon to illustrate differential space use patterns according to thermal uplift. White corresponds to highest probability of use and black lowest.

712 Appendix 1: supplementary tables and figures

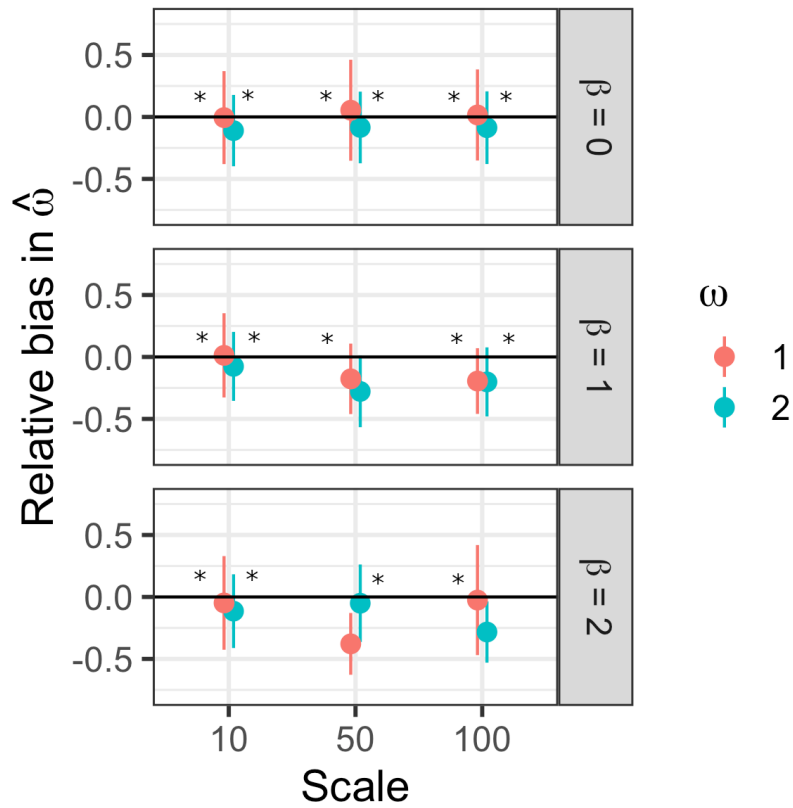

Figure S1: Relative bias in centralizing tendency when estimated with Ornstein-Uhlenbeck home range model with movement parameters estimated offline. Asterisk indicates 95% credible set captured the true value in  $> 70\%$  of the simulations.

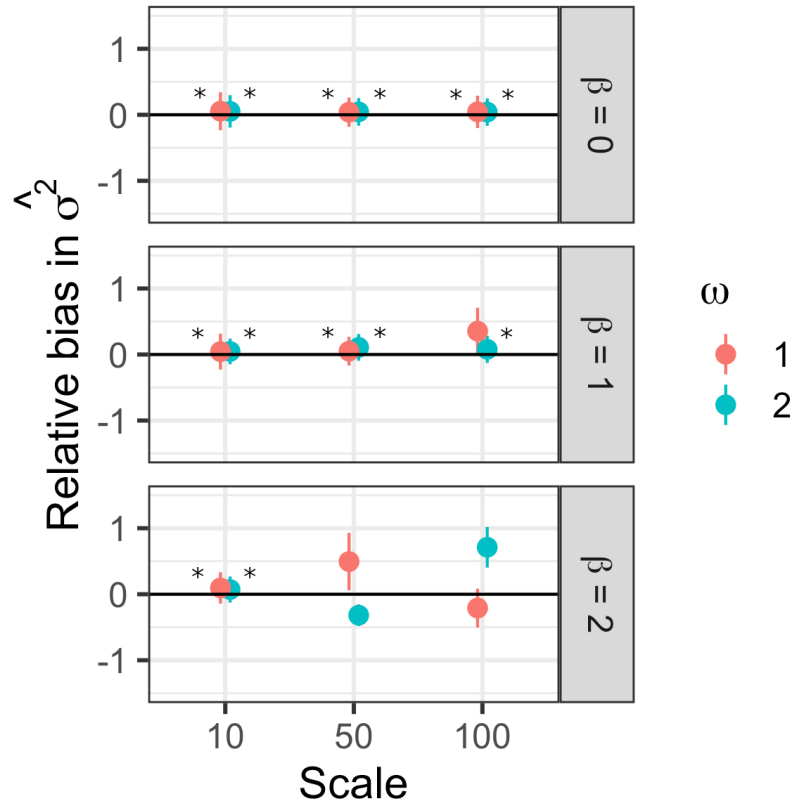

Figure S2: Relative bias in movement variance when estimated with Ornstein-Uhlenbeck home range model with movement parameters estimated offline. Asterisk indicates 95% credible set captured the true value in  $> 70\%$  of the simulations.

Table S1: Habitat types used in analysis.

| AKVWC class                                                                                                                                                                                                                                                                                                                                                                                                                                                                                                                                                                                            | habitat type |
|--------------------------------------------------------------------------------------------------------------------------------------------------------------------------------------------------------------------------------------------------------------------------------------------------------------------------------------------------------------------------------------------------------------------------------------------------------------------------------------------------------------------------------------------------------------------------------------------------------|--------------|
| Bareground                                                                                                                                                                                                                                                                                                                                                                                                                                                                                                                                                                                             | bare         |
| Freshwater or Saltwater                                                                                                                                                                                                                                                                                                                                                                                                                                                                                                                                                                                | water        |
| Bareground (Beach or Tide Flat) (Southern Alaska), Herbaceous (Marsh) (Interior Alaska, Cook Inlet Basin), Herbaceous (Marsh) (Northern and Western Alaska), Herbaceous (Tidal) (Southern Alaska), Herbaceous (Wet-Marsh) (Southern Alaska), Herbaceous (Aquatic), Low Shrub (Tidal) (Southern Alaska), Herbaceous (Wet-Marsh) (Tidal)                                                                                                                                                                                                                                                                 | wet          |
| Herbaceous (Mesic) (Interior Alaska, Cook Inlet Basin), Herbaceous (Mesic) (Northern and Western Alaska), Herbaceous (Mesic) (Southern Alaska), Herbaceous (Peatland) (Southern Alaska), Herbaceous (Wet) (Interior Alaska, Cook Inlet Basin), Herbaceous (Wet) (Northern and Western Alaska), Lichen, Moss, Moss (Southern Alaska), Sparse Vegetation (Interior Alaska, Cook Inlet Basin), Sparse Vegetation (Northern and Western Alaska), Tussock Tundra (Low shrub or Herbaceous), Fire Scar                                                                                                       | open         |
| Low Shrub, Low Shrub (Peatland) (Southern Alaska), Dwarf Shrub, Dwarf Shrub (Southern Alaska), Dwarf Shrub-Lichen, Dwarf Shrub, or Herbaceous (Mesic) (Southern Alaska), Low Shrub or Tall Shrub (Open-Closed), Low Shrub/Lichen, Low-Tall Shrub (Southern Alaska), Tall Shrub (Open-Closed)                                                                                                                                                                                                                                                                                                           | shrub        |
| Deciduous Forest (Open-Closed), Deciduous Forest (Open-Closed) (Seasonally Flooded) (Southern Alaska), Deciduous Forest (Woodland-Closed) (Southern Alaska), Hemlock (Woodland-Closed), Hemlock-Sitka Spruce (Woodland-Closed), Needleleaf Forest (Open-Closed) (Seasonally Flooded) (Southern Alaska), Needleleaf Forest (Woodland-Open) (Peatland) (Southern Alaska), Sitka Spruce (Woodland-Closed), White Spruce or Black Spruce (Open-Closed), White Spruce or Black Spruce (Woodland), White Spruce or Black Spruce-Deciduous (Open-Closed), White Spruce or Black Spruce/Lichen (Woodland-Open) | forest       |
| Urban, Agriculture, Road                                                                                                                                                                                                                                                                                                                                                                                                                                                                                                                                                                               | human        |
| Ice-Snow                                                                                                                                                                                                                                                                                                                                                                                                                                                                                                                                                                                               | ice          |

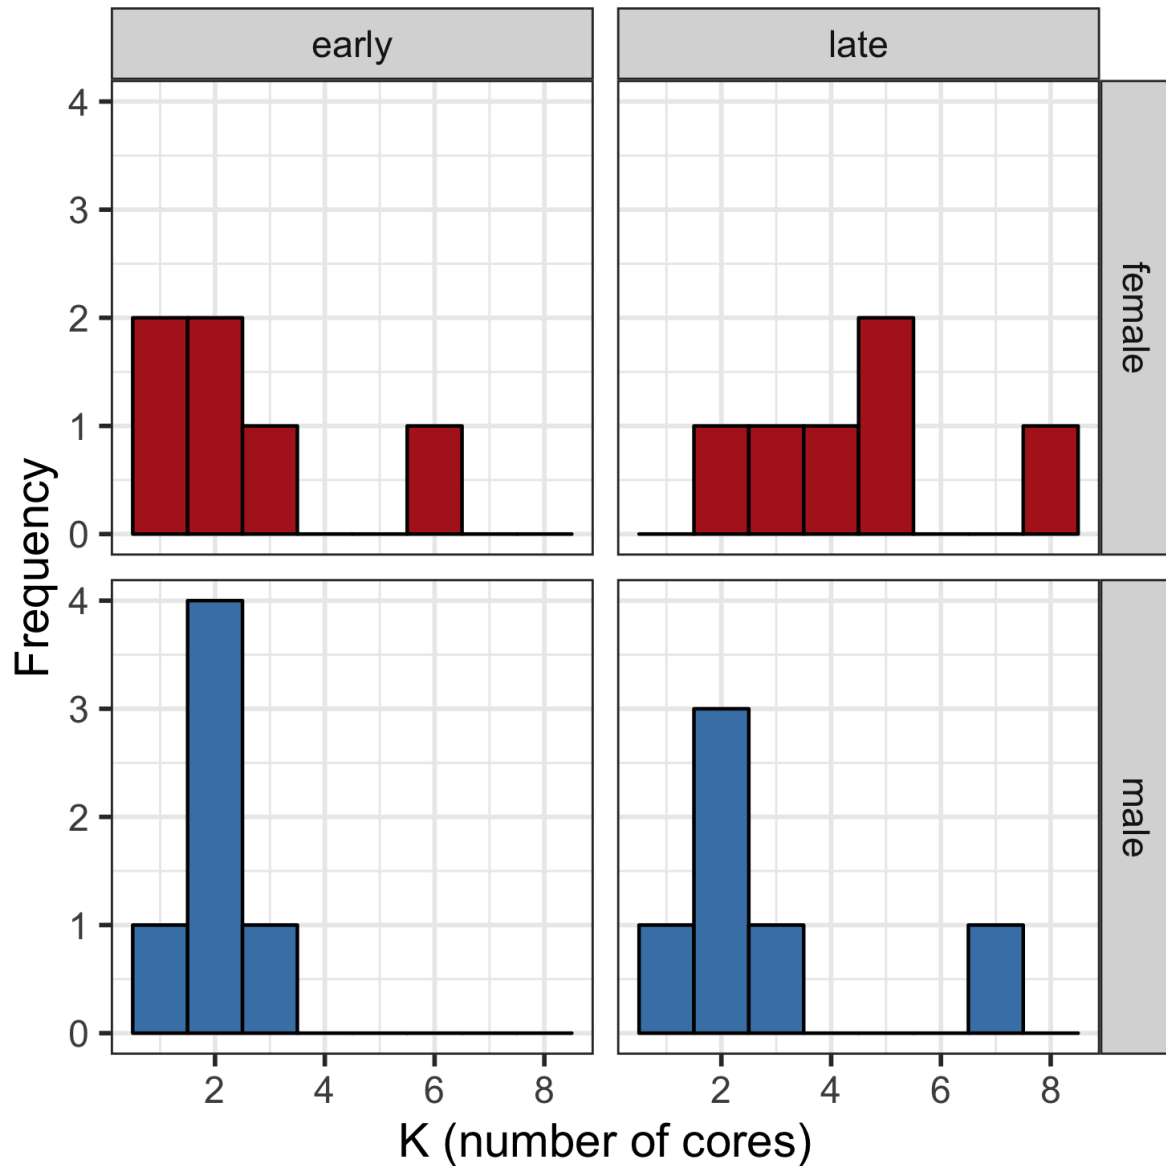

Figure S3: Number of home range cores estimated with a  $k$ -means clustering algorithm for six male and six female golden eagles with territories in southcentral Alaska. The algorithm was run separately for early and late breeding season.



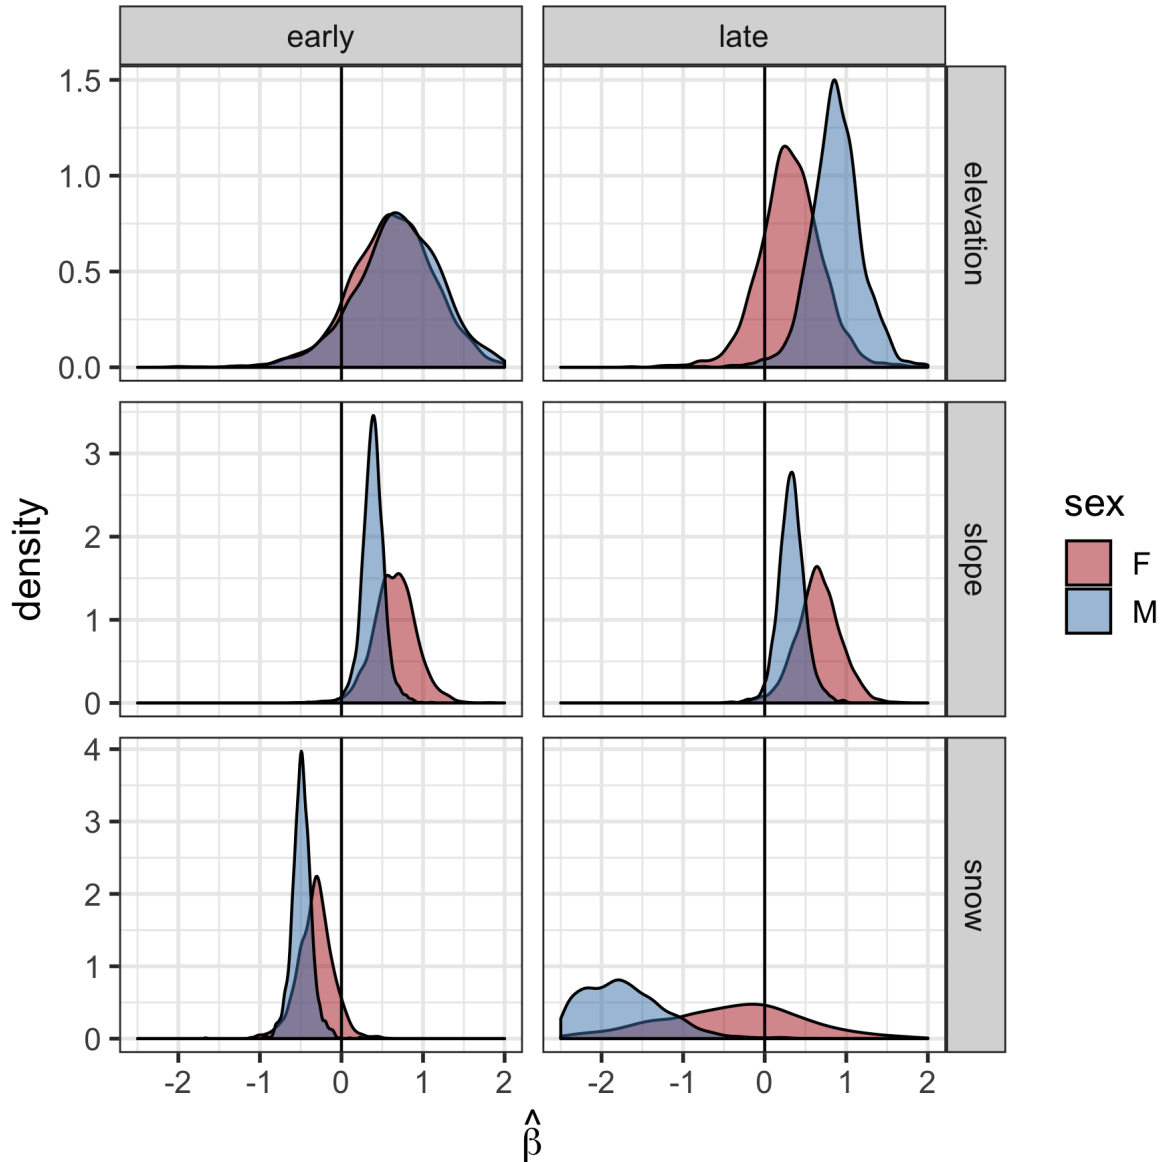

Figure S4: Marginal posterior densities of the population-level habitat selection parameters showing partitioning of certain habitat types by male and female golden eagles. These were estimated with an Ornstein-Uhlenbeck space use model for territorial golden eagles summering in southcentral Alaska. Densities were constructed with 2000 posterior samples. The snow variable was a dynamic indicator of whether or not a location was snow-free. The reference category used for estimation was 'bare'.

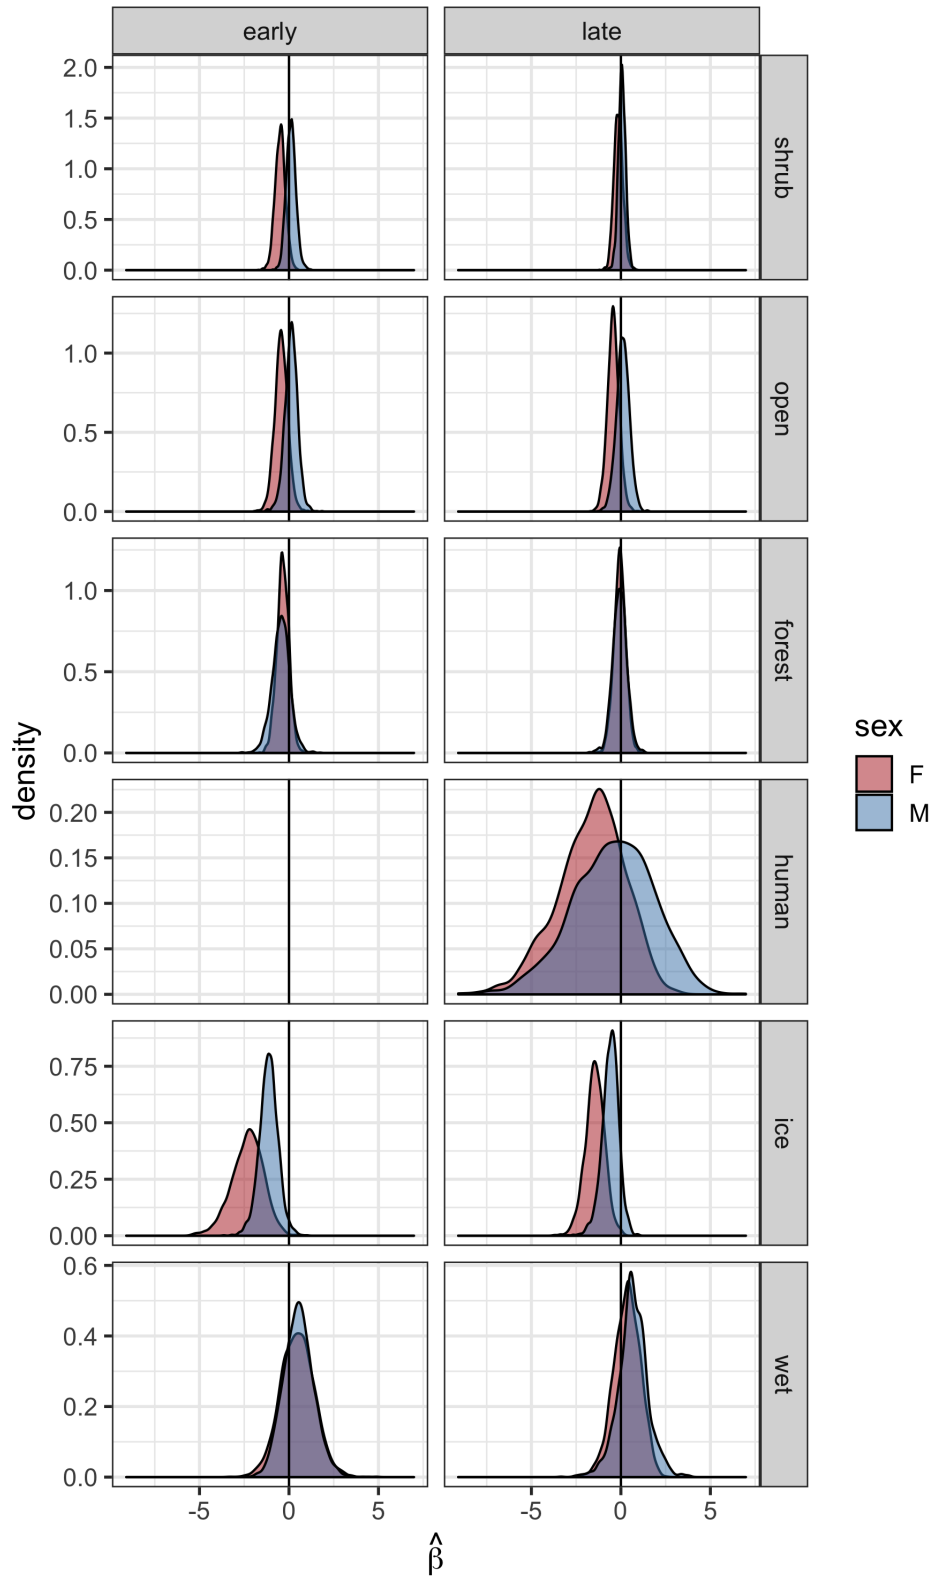

Figure S5: Full version of figure 4 from main text.

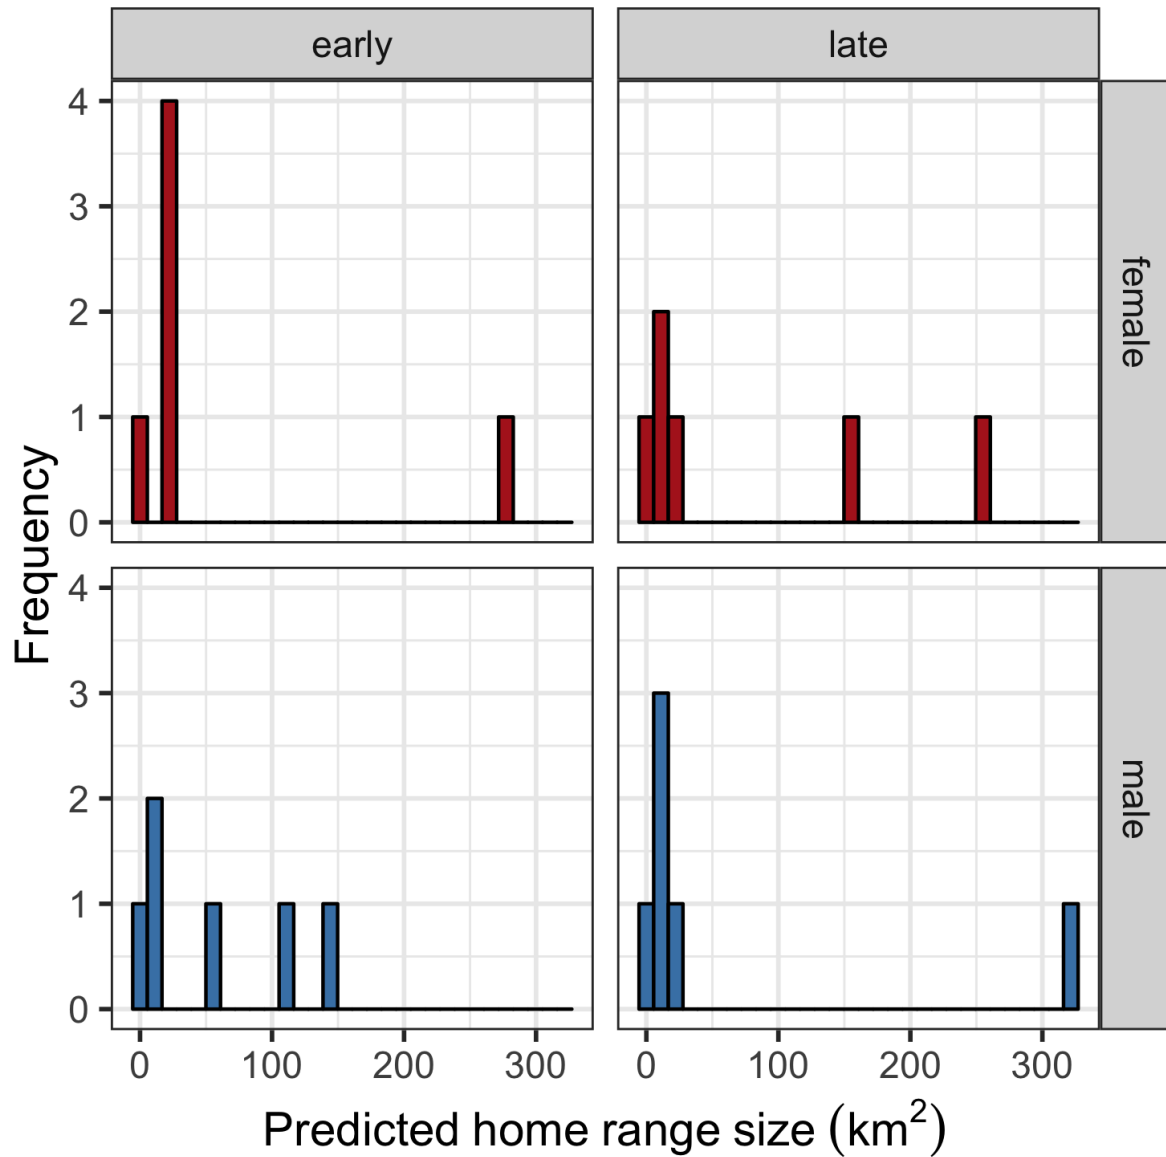

Figure S6: Home range sizes predicted from the Ornstein-Uhlenbeck space use model for territorial golden eagles summering in southcentral Alaska. Home range size was estimated as the 95% volume contour of the predicted space use distribution.

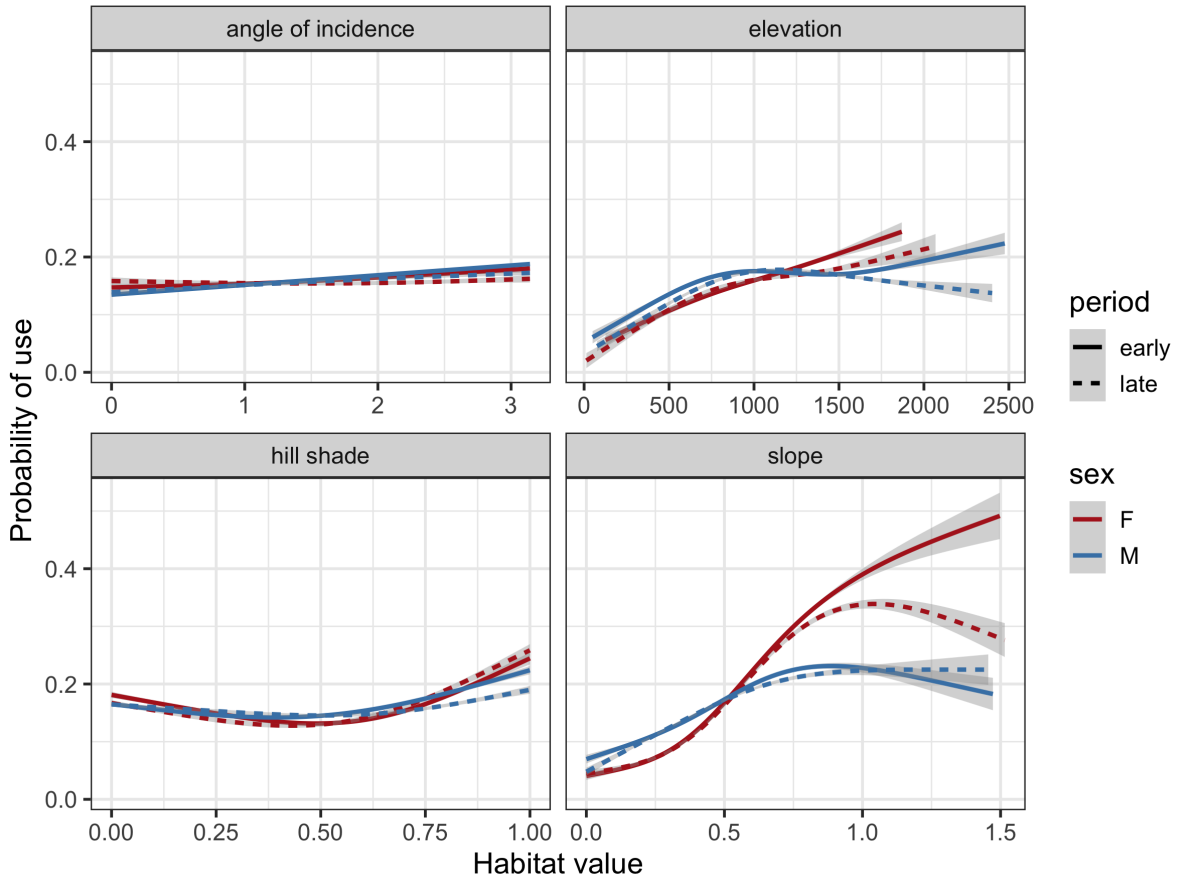

Figure S7: Version of figure 5 from the main text with common  $y$ -axis scales.

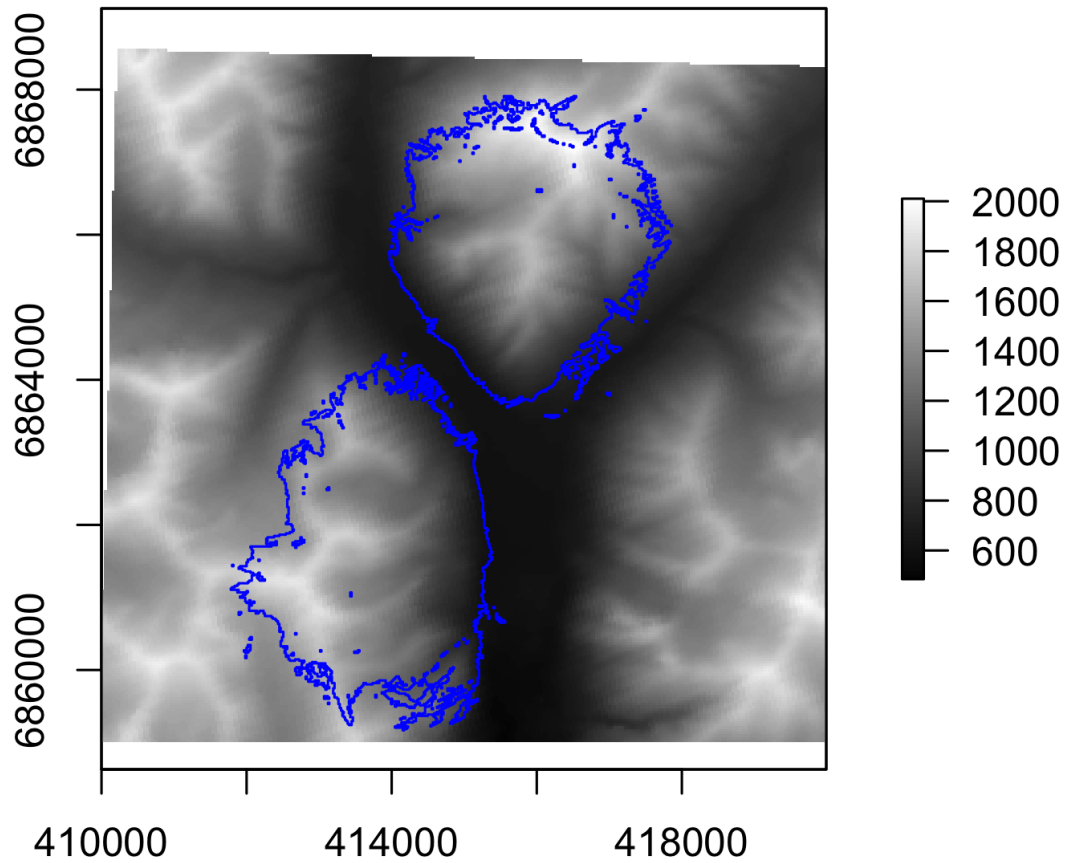

Figure S8: Example of predicted home range with two core areas. Home range boundary is the 95% volume contour of the predicted utilization distribution from the OU space use model. Base map is elevation. All units are meters.

## 713 Appendix 2: code

### 714 Stan model

```
715 data {  
716  
717   int<lower=0> N;           // length of track  
718   vector[N] dt;           // time intervals  
719   vector[2] x[N];         // observed locations  
720   int<lower=1> K;         // number of states  
721   vector[2] mu[K];        // central points  
722   int mumu[N];           // 'known' state sequence  
723   vector[K] wm[N];        // wind magnitude for each core  
724   vector[K] wc[N];        // cosine wind direction at each core  
725   vector[K] ws[N];        // sine wind direction at each core  
726   matrix[K,K] d_mu;      // inter core distance matrix  
727 }  
728  
729  
730 parameters {  
731  
732   real<lower=0> omega[K]; // attraction strength  
733   real<lower=0> sigma[K]; // diffusion parameter  
734   matrix[K,K] b;         // intercepts  
735   matrix[K,K] b_wm;      // coefficient for wind magnitude  
736   matrix[K,K] b_d;       // coefficient for inter-core distance  
737   matrix[K,K] b_wc;      // coefficient for cos(wind direction)  
738   matrix[K,K] b_ws;      // coefficient for sin(wind direction)  
739 }  
740
```

741

742

743 model {

744

745 matrix[2,2] Sigma; // var-cov matrix

746 matrix[2,2] Omega; // central attraction matrix

747

748 for (n in 2:N) {

749

750 // state is categorical draw

751 mumu[n] ~ categorical\_logit( b[,mumu[n-1]] + b\_d[,mumu[n-1]].\*d\_mu[,mumu[n-1]]

752 + b\_wm[,mumu[n-1]].\*wm[n-1] + b\_wc[,mumu[n-1]].\*wc[n-1]

753 + b\_ws[,mumu[n-1]].\*ws[n-1]);

754

755 // define movement param matrices

756 Sigma[1,1] = sigma[mumu[n]];

757 Sigma[1,2] = 0;

758 Sigma[2,1] = 0;

759 Sigma[2,2] = sigma[mumu[n]];

760

761 Omega[1,1] = -omega[mumu[n]];

762 Omega[1,2] = 0;

763 Omega[2,1] = 0;

764 Omega[2,2] = -omega[mumu[n]];

765

766 // movement equation

767 x[n] ~ multi\_normal(mu[mumu[n]] + matrix\_exp(Omega\*dt[n])

768 \* ( x[n-1] - mu[mumu[n]] ),

769 Sigma - matrix\_exp(Omega\*dt[n]) \* Sigma \* matrix\_exp(Omega'\*dt[n]) );

```
770
771   }
772
773
774   // some priors
775   sigma ~ normal(6000000, 1000000);
776   omega ~ normal(0, 1);
777   to_vector(b_wm) ~ normal(0, 10);
778   to_vector(b_ws) ~ normal(0, 10);
779   to_vector(b_wc) ~ normal(0, 10);
780   to_vector(b_d) ~ normal(0, 10);
781   to_vector(b) ~ normal(0, 10);
782
783 }
784
785
786 generated quantities{
787
788
789   matrix[2,2] Sigma;
790   matrix[2,2] Omega;
791   vector[2] x_av[N];
792
793
794   for(i in 2:N){
795
796     Sigma[1,1] = sigma[mumu[i]];
797     Sigma[1,2] = 0;
798     Sigma[2,1] = 0;
```



```
799     Sigma[2,2] = sigma[mumu[i]];
800
801     Omega[1,1] = -omega[mumu[i]];
802     Omega[1,2] = 0;
803     Omega[2,1] = 0;
804     Omega[2,2] = -omega[mumu[i]];
805
806
807     x_av[1] = x[1]; // start somewhere
808
809     // this draws available points from posterior predictive
810     x_av[i] = multi_normal_rng(mu[mumu[i]] + matrix_exp(Omega*dt[i])
811 * ( x[i-1] - mu[mumu[i]] ),
812 Sigma - matrix_exp(Omega*dt[i]) * Sigma * matrix_exp(Omega'*dt[i]) );
813
814 }
815
816
817
818
819 }
```

## 820 R code

```
821
822 #####
823 ### This chunk is done per individual###
824 #####
825
826 ### samples from posterior of multistate OU model
```

```
827 stan.fit = stan("stan_model.stan",
828               data = list(x,dt,N,K,mu,mumu,wm,ws,wc,d_mu),
829               pars=c('omega', 'sigma','b','b_d','b_wm','b_wc','b_ws','x_av'),
830               chains = 3,
831               iter = 3000,
832               warmup = 2000,
833               cores = 3,
834               control = list(max_treedepth = 13),
835               seed = 3) ### retains 3000 samples for inference
836
837
838 ### draws available points from posterior predictive
839 n_av = 5 # 5 available points per used point
840
841 x.av=matrix(rep(0,n_av), nrow = 1)
842 y.av=matrix(rep(0,n_av), nrow = 1)
843
844 for(k in 1:N){
845   x.av = rbind(x.av,sample(unlist(rstan::extract(stan.fit,
846                                           pars = paste0('x_av[',k,',1]')),
847                           use.names=F), n_av))
848   y.av = rbind(y.av,sample(unlist(rstan::extract(stan.fit,
849                                           pars = paste0('x_av[',k,',2]')),
850                           use.names=F), n_av))
851 }
852
853 x.av = x.av[-1,]
854 y.av = y.av[-1,]
855
```

856

857

858

859 #####

860 ### This chunk estimates RSF across individuals ###

861 #####

862

863 # use = bernouli used/available

864 # snow = binary indicator

865 # hab = categorical habitat types

866 # elev\_s = centered and standardized elevation

867 # slope\_s = centered and standardized slope

868 # aoi\_s = centered and standardized angle of incidence

869 # hs\_s = centered and standardized hill shade

870 # mumu = home range core

871 # id = individual id

872 # rsf\_dat = data frame holding above variables

873

874 rsf\_bfit = stan\_glmer(use ~ id # fixed effect of id to account f

875 # or variation in availability among individuals

876 + snow + (0+snow||id/mumu)

877 + hab + (0+hab||id/mumu)

878 + elev\_s + (0+elev\_s||id/mumu)

879 + slope\_s + (0+slope\_s||id/mumu)

880 + aoi\_s + (0+aoi\_s||id/mumu)

881 + hs\_s + (0+hs\_s||id/mumu)

882 + offset(aniso),

883 family=binomial(link='logit'),

884 data = rsf\_dat,

```
885         cores = 4,  
886         iter = 2500,  
887         warmup = 1500,  
888         thin = 2,  
889         algorithm = 'sampling',  
890         init_r = 0.5, ## this helps chains initialize  
891         adapt_delta = 0.95)  
892  
893  
894  
895 #####  
896 ### This function runs the second stage MCMC ###  
897 #####  
898  
899 # bj.mat.all -- list of matrices of posterior samples of b's  
900 #   from stan models (alpha in main text)  
901 # sxj.mat -- matrix of posterior samples from stan model of  
902 #   sigmax (movement variance)  
903 # omj.mat -- matrix of posterior samples from stan model of  
904 #   omega (centralizing)  
905 # n.iter -- number of mcmc iterations; same as stan models if thinned  
906 # J -- number of individuals  
907  
908 mcmc.fun = function(bj.mat.all,  
909                   sxj.mat,  
910                   omj.mat,  
911                   n.iter,  
912                   J){  
913
```

```
914  ##
915  ## Containers
916  ##
917
918  mu.save=matrix(,nrow=length(bj.mat.all),ncol = n.iter)
919  bj.save=array(,dim=c(nrow(bj.mat.all[[1]]),length(bj.mat.all),n.iter))
920  sxj.save=matrix(,nrow(bj.mat.all[[1]]),n.iter)
921  omj.save=matrix(,nrow(bj.mat.all[[1]]),n.iter)
922  om.save=0
923  sx.save=0
924  so2.save=0
925  sx2.save=0
926  s2.save=matrix(,nrow=length(bj.mat.all),ncol = n.iter)
927
928
929  ##
930  ## priors and starting values
931  ##
932
933  ## priors
934  # IG(0.001,1000) on s2
935  q=.001
936  r=1000
937  # N(0,1) on alphas
938  mu.0=0
939  s2.0=1
940  # N+(6000000,10000000^2) on sigmax (same as individ model)
941  sss.0=6000000
942  sss2.0=1000000^2
```

```
943 # N+(0,1) on omega (same as individ model)
944 mo.0=0
945 sso2.0=1
946
947 ## starting values
948 mu=0
949 s2=1
950 bj=matrix(,nrow = nrow(bj.mat.all[[1]]), ncol=length(bj.mat.all))
951 for(i in 1:length(bj.mat.all)){
952   bj[,i]=apply(bj.mat.all[[i]],1,mean)
953   mu[i]=mean(bj.mat.all[[i]])
954 }
955 omj=apply(omj.mat,1,mean)
956 om=mean(omj.mat)
957 so2=1
958 sxj=apply(sxj.mat,1,mean)
959 sx=mean(sxj.mat)
960 sx2=1
961
962
963
964 ###
965 ### MCMC loop
966 ###
967
968 for(k in 1:n.iter){
969
970
971   ##
```

```
972     ## Sample s2 (Gibbs updates)
973     ##
974
975     for(i in 1:length(mu)){
976         q.tmp=J/2+q
977         r.tmp=1/(sum((bj[,i]-mu[i])^2)/2+1/r)
978         s2[i]=1/rgamma(1,q.tmp,,r.tmp)
979     }
980
981
982     ##
983     ## Sample so2 (Gibbs updates)
984     ##
985
986     q.tmp=J/2+q
987     r.tmp=1/(sum((omj-om)^2)/2+1/r)
988     so2=1/rgamma(1,q.tmp,,r.tmp)
989
990
991     ##
992     ## Sample sx2 (Gibbs updates)
993     ##
994
995     q.tmp=J/2+q
996     r.tmp=1/(sum((sxj-sx)^2)/2+1/r)
997     sx2=1/rgamma(1,q.tmp,,r.tmp)
998
999
1000     ##
```

```
1001     ## Sample betas (Gibbs updates)
1002     ##
1003
1004     for(i in 1:length(mu)){
1005         tmp.var=1/(J/s2[i]+1/s2.0)
1006         tmp.mn=tmp.var*(sum(bj[,i])/s2[i]+mu.0/s2.0)
1007         mu[i]=rnorm(1,tmp.mn,sqrt(tmp.var))
1008     }
1009
1010
1011     ##
1012     ## Sample om (Gibbs updates)
1013     ##
1014
1015     tmp.var=1/(J/so2+1/sso2.0)
1016     tmp.mn=tmp.var*(sum(omj)/so2+mo.0/sso2.0)
1017     om=rtruncnorm(1,a=0,,tmp.mn,sqrt(tmp.var))
1018
1019
1020     ##
1021     ## Sample sx (Gibbs updates)
1022     ##
1023
1024     tmp.var=1/(J/sx2+1/sss2.0)
1025     tmp.mn=tmp.var*(sum(sxj)/sx2+sss.0/sss2.0)
1026     sx=rtruncnorm(1,a=0,,tmp.mn,sqrt(tmp.var))
1027
1028
1029     ##
```



```
1030     ## Sample individ-level betas (Metropolis steps)
1031     ##
1032
1033     for(i in 1:length(mu)){
1034         bj.star=bj.mat.all[[i]][,k]
1035         mh.1=dnorm(bj.star,mu[i],sqrt(s2[i]),log=TRUE)+
1036             dnorm(bj[,i],0,sqrt(100),log=TRUE) # individ prior N+(0,10^2)
1037         mh.2=dnorm(bj[,i],mu[i],sqrt(s2[i]),log=TRUE)+
1038             dnorm(bj.star,0,sqrt(100),log=TRUE)
1039         keep.idx=exp(mh.1-mh.2)>runif(J)
1040         bj[,i][keep.idx]=bj.star[keep.idx]
1041     }
1042
1043
1044     ##
1045     ## Sample individ-level sv's (Metropolis steps)
1046     ##
1047
1048     omj.star=omj.mat[,k]
1049     for(i in 1:J){
1050         mh.1[i]=log(dtruncnorm(omj.star[i],a=0,,om,sqrt(so2)))+
1051             log(dtruncnorm(omj[i],a=0,,mo,sqrt(sso)))
1052         mh.2[i]=log(dtruncnorm(omj[i],a=0,,om,sqrt(so2)))+
1053             log(dtruncnorm(omj.star[i],a=0,,mo,sqrt(sso)))
1054     }
1055     keep.idx=exp(mh.1-mh.2)>runif(J)
1056     omj[keep.idx]=omj.star[keep.idx]
1057
1058
```

```
1059     ##
1060     ## Sample individ-level sx's (Metropolis steps)
1061     ##
1062
1063     sxj.star=sxj.mat[,k]
1064     for(i in 1:J){
1065         mh.1[i]=log(dtruncnorm(sxj.star[i],a=0,,sx,sqrt(sx2)))+
1066             log(dtruncnorm(sxj[i],a=0,,sss.0,sqrt(sss2.0)))
1067         mh.2[i]=log(dtruncnorm(sxj[i],a=0,,sx,sqrt(sx2)))+
1068             log(dtruncnorm(sxj.star[i],a=0,,sss.0,sqrt(sss2.0)))
1069     }
1070     keep.idx=exp(mh.1-mh.2)>runif(J)
1071     sxj[keep.idx]=sxj.star[keep.idx]
1072
1073
1074     ##
1075     ## Save samples
1076     ##
1077
1078     mu.save[,k]=mu
1079     s2.save[,k]=s2
1080     bj.save[,k]=bj
1081     sxj.save[,k]=sxj
1082     omj.save[,k]=omj
1083     so2.save[k]=so2
1084     sx2.save[k]=sx2
1085     om.save[k]=om
1086     sx.save[k]=sx
1087 }
```

```
1088 list(mu=mu.save,s2=s2.save,bj=bj.save,  
1089       sxj=sxj.save,omj=omj.save,  
1090       sx=sx.save,om=om.save,  
1091       so2=so2.save,sx2=sx2.save)  
1092 }  
1093
```
